# Supplementary material for: Sucrose synthase gene family in Brassica juncea: genomic organization, evolutionary comparisons, and expression regulation
Source: PeerJ. 2021 Mar 9;9:e10878. doi: 10.7717/peerj.10878 (PMC7953879; doi:10.7717/peerj.10878)
Supplement: Supplemental Information 5 [file peerj-09-10878-s005.docx]

**Table S5:**

**Sequence and GO annotation information of SUS gene family members in *B. juncea*.**

| Name | Gene ID | Accession number | GO:biological process | GO:cellular component | GO:molecular function |
| --- | --- | --- | --- | --- | --- |
| BjuSUS01 | BjuA009339 | MW370524 | GO:0046686|response to cadmium ion;  GO:0009409|response to cold;  GO:0009413|response to flooding;  GO:0009749|response to glucose;  GO:0001666|response to hypoxia;  GO:0010555|response to mannitol;  GO:0006970|response to osmotic stress;  GO:0072708|response to sorbitol;  GO:0009744|response to sucrose;  GO:0009414|response to water deprivation;  GO:0005985|sucrose metabolic process | GO:0005829|cytosol;  GO:0009506|plasmodesma | GO:0016157|sucrose synthase activity |
| BjuSUS02 | BjuB015313 | MW370525 | GO:0046686|response to cadmium ion;  GO:0009409|response to cold;  GO:0009413|response to flooding;  GO:0009749|response to glucose;  GO:0001666|response to hypoxia;  GO:0010555|response to mannitol;  GO:0006970|response to osmotic stress;  GO:0072708|response to sorbitol;  GO:0009744|response to sucrose;  GO:0009414|response to water deprivation;  GO:0005985|sucrose metabolic process | GO:0005829|cytosol;  GO:0009506|plasmodesma | GO:0016157|sucrose synthase activity |
| BjuSUS03 | BjuA047153 | MW370526 | GO:0046686|response to cadmium ion;  GO:0009409|response to cold;  GO:0009413|response to flooding;  GO:0009749|response to glucose;  GO:0001666|response to hypoxia;  GO:0010555|response to mannitol;  GO:0006970|response to osmotic stress;  GO:0072708|response to sorbitol;  GO:0009744|response to sucrose;  GO:0009414|response to water deprivation;  GO:0005985|sucrose metabolic process | GO:0005829|cytosol;  GO:0009506|plasmodesma | GO:0016157|sucrose synthase activity |
| BjuSUS04 | BjuO008945 | MW370527 | GO:0046686|response to cadmium ion;  GO:0009409|response to cold;  GO:0009413|response to flooding;  GO:0009749|response to glucose;  GO:0001666|response to hypoxia;  GO:0010555|response to mannitol;  GO:0006970|response to osmotic stress;  GO:0072708|response to sorbitol;  GO:0009744|response to sucrose;  GO:0009414|response to water deprivation;  GO:0005985|sucrose metabolic process | GO:0005829|cytosol;  GO:0009506|plasmodesma | GO:0016157|sucrose synthase activity |
| BjuSUS05 | BjuA023848 | MW370528 | GO:0001666|response to hypoxia;  GO:0010431|seed maturation;  GO:0005982|starch metabolic process;  GO:0005985|sucrose metabolic process | GO:0005829|cytosol;  GO:0016020|membrane;  GO:0009505|plant-type cell wall;  GO:0042170|plastid membrane | GO:0016157|sucrose synthase activity |
| BjuSUS06 | BjuB037515 | MW370529 | GO:0001666|response to hypoxia;  GO:0010431|seed maturation;  GO:0005982|starch metabolic process;  GO:0005985|sucrose metabolic process | GO:0005829|cytosol;  GO:0016020|membrane;  GO:0009505|plant-type cell wall;  GO:0042170|plastid membrane | GO:0016157|sucrose synthase activity |
| BjuSUS07 | BjuA036504 | MW370530 | GO:0010555|response to mannitol;  GO:0009414|response to water deprivation;  GO:0010431|seed maturation;  GO:0005982|starch metabolic process;  GO:0005985|sucrose metabolic process | N/A | GO:0016157|sucrose synthase activity |
| BjuSUS08 | BjuO006586 | MW370531 | GO:0010555|response to mannitol;  GO:0009414|response to water deprivation;  GO:0010431|seed maturation;  GO:0005982|starch metabolic process;  GO:0005985|sucrose metabolic process | N/A | GO:0016157|sucrose synthase activity |
| BjuSUS09 | BjuA018844 | MW370532 | GO:0080165|callose deposition in phloem sieve plate;  GO:0005985|sucrose metabolic process | GO:0005618|cell wall;  GO:0005576|extracellular regio | GO:0016157|sucrose synthase activity |
| BjuSUS10 | BjuB022852 | MW370533 | GO:0080165|callose deposition in phloem sieve plate;  GO:0005985|sucrose metabolic process | GO:0005618|cell wall;  GO:0005576|extracellular regio | GO:0016157|sucrose synthase activity |
| BjuSUS11 | BjuA043452 | MW370534 | GO:0080165|callose deposition in phloem sieve plate;  GO:0005985|sucrose metabolic process | GO:0005618|cell wall;  GO:0005576|extracellular regio | GO:0016157|sucrose synthase activity |
| BjuSUS12 | BjuB030220 | MW370535 | GO:0080165|callose deposition in phloem sieve plate;  GO:0005985|sucrose metabolic process | GO:0005618|cell wall;  GO:0005576|extracellular regio | GO:0016157|sucrose synthase activity |
| BjuSUS13 | BjuB030962 | MW370536 | GO:0080165|callose deposition in phloem sieve plate;  GO:0005985|sucrose metabolic process | GO:0005618|cell wall;  GO:0005576|extracellular regio | GO:0016157|sucrose synthase activity |
| BjuSUS14 | BjuB047347 | MW370537 | GO:0080165|callose deposition in phloem sieve plate;  GO:0005985|sucrose metabolic process | GO:0005618|cell wall;  GO:0005576|extracellular regio | GO:0016157|sucrose synthase activity |
