# Supplementary material for: Sucrose synthase gene family in Brassica juncea: genomic organization, evolutionary comparisons, and expression regulation
Source: PeerJ. 2021 Mar 9;9:e10878. doi: 10.7717/peerj.10878 (PMC7953879; doi:10.7717/peerj.10878)
Supplement: Supplemental Information 6 — SUS proteins used in phylogentic tree were represented in Sheet 1. Raw data corresponding to Figs. 7, 8 and 9 were represented in Sheet 2. [file peerj-09-10878-s006.xlsx]

## Sheet: raw data sheet 1
SUS proteins used in phylogentic tree
>AtSUS1
MANAERMITRVHSQRERLNETLVSERNEVLALLSRVEAKGKGILQQNQIIAEFEALPEQTRKKLEGGPFF
DLLKSTQEAIVLPPWVALAVRPRPGVWEYLRVNLHALVVEELQPAEFLHFKEELVDGVKNGNFTLELDFE
PFNASIPRPTLHKYIGNGVDFLNRHLSAKLFHDKESLLPLLKFLRLHSHQGKNLMLSEKIQNLNTLQHTL
RKAEEYLAELKSETLYEEFEAKFEEIGLERGWGDNAERVLDMIRLLLDLLEAPDPCTLETFLGRVPMVFN
VVILSPHGYFAQDNVLGYPDTGGQVVYILDQVRALEIEMLQRIKQQGLNIKPRILILTRLLPDAVGTTCG
ERLERVYDSEYCDILRVPFRTEKGIVRKWISRFEVWPYLETYTEDAAVELSKELNGKPDLIIGNYSDGNL
VASLLAHKLGVTQCTIAHALEKTKYPDSDIYWKKLDDKYHFSCQFTADIFAMNHTDFIITSTFQEIAGSK
ETVGQYESHTAFTLPGLYRVVHGIDVFDPKFNIVSPGADMSIYFPYTEEKRRLTKFHSEIEELLYSDVEN
KEHLCVLKDKKKPILFTMARLDRVKNLSGLVEWYGKNTRLRELANLVVVGGDRRKESKDNEEKAEMKKMY
DLIEEYKLNGQFRWISSQMDRVRNGELYRYICDTKGAFVQPALYEAFGLTVVEAMTCGLPTFATCKGGPA
EIIVHGKSGFHIDPYHGDQAADTLADFFTKCKEDPSHWDEISKGGLQRIEEKYTWQIYSQRLLTLTGVYG
FWKHVSNLDRLEARRYLEMFYALKYRPLAQAVPLAQDD
>AtSUS2
MPTGRFETMREWVYDAISAQRNELLSLFSRYVAQGKGILQSHQLIDEFLKTVKVDGTLEDLNKSPFMKVL
QSAEEAIVLPPFVALAIRPRPGVREYVRVNVYELSVDHLTVSEYLRFKEELVNGHANGDYLLELDFEPFN
ATLPRPTRSSSIGNGVQFLNRHLSSIMFRNKESMEPLLEFLRTHKHDGRPMMLNDRIQNIPILQGALARA
EEFLSKLPLATPYSEFEFELQGMGFERGWGDTAQKVSEMVHLLLDILQAPDPSVLETFLGRIPMVFNVVI
LSPHGYFGQANVLGLPDTGGQVVYILDQVRALENEMLLRIQKQGLEVIPKILIVTRLLPEAKGTTCNQRL
ERVSGTEHAHILRIPFRTEKGILRKWISRFDVWPYLETFAEDASNEISAELQGVPNLIIGNYSDGNLVAS
LLASKLGVIQCNIAHALEKTKYPESDIYWRNHEDKYHFSSQFTADLIAMNNADFIITSTYQEIAGSKNNV
GQYESHTAFTMPGLYRVVHGIDVFDPKFNIVSPGADMTIYFPYSDKERRLTALHESIEELLFSAEQNDEH
VGLLSDQSKPIIFSMARLDRVKNLTGLVECYAKNSKLRELANLVIVGGYIDENQSRDREEMAEIQKMHSL
IEQYDLHGEFRWIAAQMNRARNGELYRYIADTKGVFVQPAFYEAFGLTVVESMTCALPTFATCHGGPAEI
IENGVSGFHIDPYHPDQVAATLVSFFETCNTNPNHWVKISEGGLKRIYERYTWKKYSERLLTLAGVYAFW
KHVSKLERRETRRYLEMFYSLKFRDLANSIPLATDEN
>AtSUS3
MANPKLTRVLSTRDRVQDTLSAHRNELVALLSRYVDQGKGILQPHNLIDELESVIGDDETKKSLSDGPFG
EILKSAMEAIVVPPFVALAVRPRPGVWEYVRVNVFELSVEQLTVSEYLRFKEELVDGPNSDPFCLELDFE
PFNANVPRPSRSSSIGNGVQFLNRHLSSVMFRNKDCLEPLLDFLRVHKYKGHPLMLNDRIQSISRLQIQL
SKAEDHISKLSQETPFSEFEYALQGMGFEKGWGDTAGRVLEMMHLLSDILQAPDPSSLEKFLGMVPMVFN
VVILSPHGYFGQANVLGLPDTGGQVVYILDQVRALETEMLLRIKRQGLDISPSILIVTRLIPDAKGTTCN
QRLERVSGTEHTHILRVPFRSEKGILRKWISRFDVWPYLENYAQDAASEIVGELQGVPDFIIGNYSDGNL
VASLMAHRMGVTQCTIAHALEKTKYPDSDIYWKDFDNKYHFSCQFTADLIAMNNADFIITSTYQEIAGTK
NTVGQYESHGAFTLPGLYRVVHGIDVFDPKFNIVSPGADMTIYFPYSEETRRLTALHGSIEEMLYSPDQT
DEHVGTLSDRSKPILFSMARLDKVKNISGLVEMYSKNTKLRELVNLVVIAGNIDVNKSKDREEIVEIEKM
HNLMKNYKLDGQFRWITAQTNRARNGELYRYIADTRGAFAQPAFYEAFGLTVVEAMTCGLPTFATCHGGP
AEIIEHGLSGFHIDPYHPEQAGNIMADFFERCKEDPNHWKKVSDAGLQRIYERYTWKIYSERLMTLAGVY
GFWKYVSKLERRETRRYLEMFYILKFRDLVKTVPSTADD
>AtSUS4
MANAERVITRVHSQRERLDATLVAQKNEVFALLSRVEAKGKGILQHHQIIAEFEAMPLETQKKLKGGAFF
EFLRSAQEAIVLPPFVALAVRPRPGVWEYVRVNLHDLVVEELQASEYLQFKEELVDGIKNGNFTLELDFE
PFNAAFPRPTLNKYIGDGVEFLNRHLSAKLFHDKESLHPLLKFLRLHSHEGKTLMLNNRIQNLNTLQHNL
RKAEEYLMELKPETLYSEFEHKFQEIGLERGWGDTAERVLNMIRLLLDLLEAPDPCTLENFLGRIPMVFN
VVILSPHGYFAQDNVLGYPDTGGQVVYILDQVRALETEMLQRIKQQGLNITPRILIITRLLPDAAGTTCG
QRLEKVYGSQYCDILRVPFRTEKGIVRKWISRFEVWPYLETFTEDVAAEISKELQGKPDLIIGNYSDGNL
VASLLAHKLGVTQCTIAHALEKTKYPDSDIYWKKLDEKYHFSCQFTADLIAMNHTDFIITSTFQEIAGSK
DTVGQYESHRSFTLPGLYRVVHGIDVFDPKFNIVSPGADMSIYFAYTEEKRRLTAFHLEIEELLYSDVEN
EEHLCVLKDKKKPIIFTMARLDRVKNLSGLVEWYGKNTRLRELVNLVVVGGDRRKESQDNEEKAEMKKMY
ELIEEYKLNGQFRWISSQMNRVRNGELYRYICDTKGAFVQPALYEAFGLTVVEAMTCGLPTFATCNGGPA
EIIVHGKSGFHIDPYHGDKAAESLADFFTKCKHDPSHWDQISLGGLERIQEKYTWQIYSQRLLTLTGVYG
FWKHVSNLDRLESRRYLEMFYALKYRPLAQAVPLAHEE
>AtSUS5
MEMTSGSLGNGIPEAMGQNRGNIKRCLEKYIENGRRVMKLNELMDEMEIVINDVTQRRRVMEGDLGKILC
FTQEAVVIPPNVAFAVRGTPGNWQYVKVNSSNLSVEALSSTQYLKLKEFLFDENWANDENALEVDFGALD
FTLPWLSLSSSIGNGLSFVSSKLGGRLNDNPQSLVDYLLSLEHQGEKLMMNETLNTARKLEMSLILADVF
LSELPKDTPFQAFELRFKECGFEKGWGESAGRVKETMRILSEILQAPDPQNIDRFFARVPRIFNVVIFSV
HGYFGQTDVLGLPDTGGQVVYILDQVKALEDELLQRINSQGLNFKPQILVVTRLIPDAKKTKCNQELEPI
FGTKYSNILRIPFVTENGILRRWVSRFDIYPYLERFTKDATTKILDILEGKPDLIIGNYTDGNLVASLMA
NKLGITQATIAHALEKTKYEDSDIKWKEFDPKYHFSSQFTADLISMNSADFIIASTYQEIAGSKERAGQY
ESHMSFTVPGLYRVVSGINVFDPRFNIAAPGADDSIYFPFTAQDRRFTKFYTSIDELLYSQSENDEHIGY
LVDKKKPIIFSMARLDVVKNLTGLTEWYAKNKRLRDLVNLVIVGGFFDASKSKDREEISEIKKMHSLIEK
YQLKGQFRWITAQTDRTRNGELYRSIADTRGAFVQPAHYEAFGLTVIEAMSCGLVTFATNQGGPAEIIVD
GVSGFHIDPSNGEESSDKIADFFEKSGMDPDYWNMFSNEGLQRINECYTWKIYANKVINMGSTYSYWRHL
NKDQKLAKQRYIHSFYNLQYRNLVKTIPILSDIPEPPPLPPKPLVKPSASKGSKRTQPRLSFRLFGA
>AtSUS6
MSSSSQAMLQKSDSIAEKMPDALKQSRYHMKRCFASFVGGGKKLMKREHLMNEIEKCIEDSRERSKILEG
LFGYILTCTQEAAVVPPFVALAARPNPGFWEYVKVNSGDLTVDEITATDYLKLKESVFDESWSKDENALE
IDFGAIDFTSPRLSLSSSIGKGADYISKFISSKLGGKSDKLEPLLNYLLRLNHHGENLMINDDLNTVAKL
QKSLMLAVIVVSTYSKHTPYETFAQRLKEMGFEKGWGDTAERVKETMIILSEVLEAPDNGKLDLLFSRLP
TVFNVVIFSVHGYFGQQDVLGLPDTGGQVVYILDQVRALEEELLIRINQQGLGFKPQILVVTRLIPEARG
TKCDQELEAIEGTKHSHILRVPFVTNKGVLRQWVSRFDIYPYLERFTQDATSKILQRLDCKPDLIIGNYT
DGNLVASLMATKLGVTQGTIAHALEKTKYEDSDAKWKELDPKYHFSCQFTADLIAMNVTDFIITSTYQEI
AGSKDRPGQYESHTAFTMPGLCRVVSGIDVFDPKFNIAAPGADQSVYFPYTEKDKRFTKFHPSIQELLYN
EKDNAEHMGYLADREKPIIFSMARLDTVKNITGLVEWYGKDKRLREMANLVVVAGFFDMSKSNDREEKAE
IKKMHDLIEKYKLKGKFRWIAAQTDRYRNSELYRCIADTKGVFVQPALYEAFGLTVIEAMNCGLPTFATN
QGGPAEIIVDGVSGFHIDPNNGDESVTKIGDFFSKCRSDGLYWDNISKGGLKRIYECYTWKIYAEKLLKM
GSLYGFWRQVNEDQKKAKKRYIEMLYNLQFKQLTKKVTIPEDKPLPLRLASLRNLLPKKTTNLGAGSKQK
EVTETEKTKQKSKDGQEQHDVKVGEREVREGLLAADASERVKKVLESSEEKQKLEKMKIAYGQQHSQGAS
PVRNLFWSVVVCLYICYILKQRFFGANSAQEY
>OsSUS1
MGEAAGDRVLSRLHSVRERIGDSLSAHPNELVAVFTRLVNLGKGMLQAHQIIAEYNNAISEADREKLKDG
AFEDVLRSAQEGIVISPWVALAIRPRPGVWEYVRVNVSELAVELLTVPEYLQFKEQLVEEGTNNNFVLEL
DFEPFNASFPRPSLSKSIGNGVQFLNRHLSSKLFHDKESMYPLLNFLRAHNYKGMTMMLNDRIRSLSALQ
GALRKAEEHLSGLSADTPYSEFHHRFQELGLEKGWGDCAKRSQETIHLLLDLLEAPDPSTLEKFLGTIPM
VFNVVIMSPHGYFAQANVLGYPDTGGQVVYILDQVRAMENEMLLRIKQQGLNITPRILIVTRLLPDATGT
TCGQRLEKVLGTEHTHILRVPFRTENGIVRKWISRFEVWPYLETFTDDVAHEIAGELQANPDLIIGNYSD
GNLVACLLAHKMGVTHCTIAHALEKTKYPNSDLYWKKFEDHYHFSCQFTTDLIAMNHADFIITSTFQEIA
GNKDTVGQYESHMAFTMPGLYRVVHGIDVFDPKFNIVSPGADMSIYFPYSESRKRLTSLHPEIEELLYSE
VDNNEHKFMLKDRNKPIIFSMARLDRVKNLTGLVELYGRNPRLQELVNLVVVCGDHGNPSKDKEEQAEFK
KMFDLIEQYNLNGHIRWISAQMNRVRNGELYRYICDTKGAFVQPAFYEAFGLTVVESMTCGLPTFATAYG
GPAEIIVNGVSGFHIDPYQGDKASALLVEFFEKCQEDPSHWTKISQGGLQRIEEKYTWKLYSERLMTLTG
VYGFWKYVSNLERRETRRYLEMLYALKYRTMASTVPLAVEGEPSNK
>OsSUS2
MAAKLARLHSLRERLGATFSSHPNELIALFSRYVNQGKGMLQRHQLLAEFDALIEADKEKYAPFEDILRA
AQEAIVLPPWVALAIRPRPGVWDYIRVNVSELAVEELSVSEYLAFKEQLVDGHTNSNFVLELDFEPFNAS
FPRPSMSKSIGNGVQFLNRHLSSKLFQDKESLYPLLNFLKAHNHKGTTMMLNDRIQSLRGLQSSLRKAEE
YLMGIPQDTPYSEFNHRFQELGLEKGWGDCAKRVLDTIHLLLDLLEAPDPANLEKFLGTIPMMFNVVILS
PHGYFAQSNVLGYPDTGGQVVYILDQVRALENEMLLRIKQQGLDITPKILIVTRLLPDAVGTTCGQRVEK
VIGTEHTDILRVPFRSENGILRKWISRFDVWPFLETYTEDVANEIMREMQAKPDLIIGNYSDGNLVATLL
AHKLGVTQCTIAHALEKTKYPNSDIYLDKFDSQYHFSCQFTADLIAMNHTDFIITSTFQEIAGSKDTVGQ
YESHIAFTLPGLYRVVHGIDVFDPKFNIVSPGADMSVYFPYTEADKRLTAFHPEIEELLYSEVENDEHKF
VLKDKNKPIIFSMARLDRVKNMTGLVEMYGKNAHLRDLANLVIVCGDHGNQSKDREEQAEFKKMYGLIDQ
YKLKGHIRWISAQMNRVRNGELYRYICDTKGVFVQPAFYEAFGLTVIEAMTCGLPTIATCHGGPAEIIVD
GVSGLHIDPYHSDKAADILVNFFEKCKQDSTYWDNISQGGLQRIYEKYTWKLYSERLMTLTGVYGFWKYV
SNLERRETRRYIEMFYALKYRSLASAVPLAVDGESTSK
>OsSUS3
MGETTGERALTRLHSMRERIGDSLSAHTNELVAVFSRLVNQGKGMLQPHQIIAEYNAAIPEGEREKLKDS
ALEDVLRGAQEAIVIPPWIALAIRPRPGVWEYLRINVSQLGVEELSVPEYLQFKEQLVDGSTQNNFVLEL
DFEPFNASFPRPSLSKSIGNGVQFLNRHLSSKLFHDKESMYPLLNFLRAHNYKGMTMMLNDRIRSLDALQ
GALRKAEKHLAGITADTPYSEFHHRFQELGLEKGWGDCAQRVRETIHLLLDLLEAPEPSALEKFLGTIPM
VFNVVILSPHGYFAQANVLGYPDTGGQVVYILDQVRAMENEMLLRIKQQGLNITPRILIVTRLLPDAHGT
TCGQRLEKVLGTEHTHILRVPFRTENGTVRKWISRFEVWPYLETYTDDVAHEISGELQATPDLIIGNYSD
GNLVACLLAHKLGVTHCTIAHALEKTKYPNSDLYWKKFEDHYHFSCQFTADLIAMNHADFIITSTFQEIA
GNKETVGQYESHMAFTMPGLYRVVHGIDVFDPKFNIVSPGADMSIYFPFTESQKRLTSLHLEIEELLFSD
VENTEHKFVLKDKKKPIIFSMARLDHVKNLTGLVELYGRNPRLQELVNLVVVCGDHGKESKDKEEQAEFK
KMFNLIEQYNLNGHIRWISAQMNRVRNGELYRYICDMRGAFVQPALYEAFGLTVIEAMTCGLPTFATAYG
GPAEIIVHGVSGYHIDPYQNDKASALLVEFFEKCQEDPNHWIKISQGGLQRIEEKYTWKLYSERLMTLSG
VYGFWKYVTNLDRRETRRYLEMLYALKYRKMATTVPLAIEGEASTK
>OsSUS4
MSGPKLDRTPSIRDRVEDTLHAHRNELVALLSKYVSQGKGILQPHHILDALDEVQSSGGRALVEGPFLDV
LRSAQEAIVLPPFVAIAVRPRPGVWEYVRVNVHELSVEQLTVSEYLRFKEELVDGQYNDPYILELDFEPF
NASVPRPNRSSSIGNGVQFLNRHLSSIMFRNKDCLEPLLDFLRGHRHKGHVMMLNDRIQSLGRLQSVLTK
AEEHLSKLPADTPYSQFAYKFQEWGLEKGWGDTAGYVLEMIHLLLDVLQAPDPSTLETFLGRIPMIFNVV
VVSPHGYFGQANVLGLPDTGGQIVYILDQVRALENEMVLRLKKQGLDFTPKILIVTRLIPEAKGTSCNQR
LERISGTQHTYILRVPFRNENGILRKWISRFDVWPYLEKFAEDAAGEIAAELQGTPDFIIGNYSDGNLVA
SLLSYKMGITQCNIAHALEKTKYPDSDIYWTKYDEKYHFSCQFTADIIAMNNADFIITSTYQEIAGSKNT
VGQYESHTAFTLPGLYRIVHGIDVFDPKFNIVSPGADMSIYFPYTEKAKRLTSLHGSLENLISDPEQNDE
HIGHLDDRSKPILFSMARLDRVKNITGLVEAYAKNARLRELVNLVVVAGYNDVKKSKDREEIAEIEKMHE
LIKTYNLFGQFRWISAQTNRARNGELYRYIADTHGAFVQPAFYEAFGLTVVEAMTCGLPTFATVHGGPAE
IIEHGISGFHIDPYHPDQAANLIADFFEQCKQDPNHWVEVSNRGLQRIYEKYTWKIYSERLMTLAGVYGF
WKYVSKLERRETRRYLEMFYILKFRELAKTVPLAVDEAH
>OsSUS5
MASKLSFKRMDSIAETMPDALRQSRYQMKRCFQRYVSKGKRLLKNQQLMEELEKSLDDKVEKEKLVEGFL
GYIICSTQEAVVLPPFVAFAVRMNPGIWEYVKVHSDDLSVEGITPSEYLKFKETLYDEKWAKDDNSLEVD
FGALDLSTPHLTLPSSIGNGLQFVSKFMSSKLGGKPESMKPLLDYLLTLNYRGEKLMINDTIDTVSKLQT
ALLLAEVFVSGLPKYTPYLKFEQRFQEWGLERGWGDTAERCKETLNCLSEVLQAPDPTNMEKFFSRVPSI
FNIVIFSIHGYFGQEKVLGLPDTGGQVVYILDQVRAMEEELLQRIKQQGLHVTPKILVLTRLIPDAKGTK
CNVELEPVENTKYSHILRVPFKTEDGKDLRQWVSRFDIYPYLERYAQDSCAKILDILEGKPDLIIGNYTD
GNLVASLLSNKLCVTQGTIAHALEKTKYEDSDVKWREMDQKYHFSCQFTADMISMNTSDFIITSTYQEIA
GSKEKPGQYEHHYAFTMPGLCRYATGINVFDPKFNIAAPGADQSIYFPFTQKQKRLTDLHPQIDELLYSK
DDTDEHIGYLADRNKPIIFSMARLDKVKNKKLRDLVNLVVVAGLLDASQSKDREEIEEINKMHNLMDRYQ
LKGQIRWIKAQTDRVRNGELYRCIADTKGAFVQPALYEAFGLTVIEAMNCGLPTFATNQGGPAEIIIDGV
SGFHVNPINDREAGIKIADFFQKCKEDPSYWNKVSTAGLQRICECYTWKIYATRVLNMGSTYSFWKTLNK
EERQAKQRYLQIFYNVQYRNLAKAMARAGDQQARQTTTGVAPSEIVVRPKERKPQTRMQRILTRLAGQKP
PVSE
>OsSUS6
MAVGLRRSDSIADMMPEALRQSRYQMKRCFQRYVSQGKRLMKRQQLLDELDKSVDDKADKDQLLQGFLGY
VISSTQEAAVLPPFVAFAVRMNPGIWEFVKVHSANLSVEQMTPSDYLKNKEALVDDKWGAYDDDSQLEVD
FGALDLSTPHLTLPSSIGKGAHLVSRFMSSKLTDNKKPLLDYLLALSHRGDKLMINDILDTVDKLQTALL
LAEVYVAGLHPDTNYSEFEQKFQEWGLEKGWGDTAETCKETLSSLSEVLQAPDPINMEKFFSTVPCVFTV
VIFSIHGYFGQEKVLGMPDTGGQVVYILDQVRALEDELLQRIKQQGLNATPKILVLTRLIPEAKGTKCNV
ELEPIENTKHSNILRVPFKTEDGKVLPQWVSRFDIYPYLERYAQDSSVKILEILEGKPDLVIGNYTDGNL
VASLLTSKLGVTQGTIAHALEKTKYEDSDIKWRELDHKYHFSCQFTADMIAMNTSDFIIASTYQEIAGSK
EKPGQYESHYAFTMPGLCRYATGINVFDPKFNIAAPGADQSVYFPFTQKQKRLTDLHPQIEELLYSKEDN
NEHIGHLADRSKPIIFSMARLDKIKNITGLVEWYGQNKRLRDLVNLVIVGGLLDPSQSKDREEIEEINKM
HSLINKYQLVGQIRWIKGQTDRVRNGELYRCIADTKGAFVQPALYEAFGLTVIEAMNCGLPTFATNQGGP
AEIIVDEVSGFHINPLNGKEASDKIADFFQKCKEDLIYWSKMSTAGLQRIYECYTWQIYATKVLNMASIY
GFWRTLDKEERQAKQHYLHMFYNLQFRKLAKNVPTLGEQPAQPTESAEPNRIIPRPKERQVCPFLRNLLK
KETGNN
>BjuSUS01
MVNGVLTRVHSQRERLNETLVAQRNEVLALLSRVEAKGKGILQQNQIIAEFEALPEETQKKIEGGAFFDL
LKTTQEAIVLPPWVALAVRPRPGVWEYIRVNLHALVVEELQPAEFLHFKEELVDGVKNGDFTLELDFEPF
NASVPRPTLPKYIGDGVEFLNRHLSAKLFHEKDSLLPLLKFLQLHSHQGKTLMLNEKIQNLNTLQHILRK
AEEYLAELSPETPYEDFEAKFEEIGLERGWGNNAERVLDMLRLLLDLLEAPDPCTLETFLGRIPMVFNVV
ILSPHGYFAQDNVLGYPDTGGQVVYILDQVRALETEMLQRIKQQGLNITPRILILTRLLPDAVGTTCGER
LERVDGSEYCDILRVPFRTEKGIVRKWISRFEVWPYLETYTEDAAVELAKELKGKPDLIIGNYSDGNLVA
SLLAHKLGVTQCTIAHALEKTKYPDSDIYWKKLDDKYHFSCQFTADLFAMNHTDFIITSTLQEIAGSKDT
VGQYESHTAFTLPGLYRVVHGIDVFDPKFNIVSPGADMSIYFPYTEEKRRLTKFHPEIEELLYSDVENQE
HLCVLKDKKKPILFTMARLDRVKNLSGLVEWYGKNKRLRELVNLVVVGGDRRKESKDNEEKAEMKRMYDL
IDEYKLNGQFRWISSQMNRVRNGELYRYICDTKGAFVQPALYEAFGLTVVEAMTCGLPTFATCKGGPAEI
IVHGKSGFHIDPYHGDQAADTLADFFTKCKEDPSHWDEISKGGLQRIEEKYTWQIYSQRLLTLTGVYGFW
KHVSNLDRLESRRYLEMFYALKYRPLAKAVPLAEEE
>BjuSUS02
MVNGVLTRVHSQRERLNQTLVAQRNEVLALLSRIEAKGKGILQQNQIIAEFEALPEETQKKIEGGAFFDL
LKTTQEAIVLPPWVALAVRPRPGVWEYIRVNLHALVVEELQPAEFLHFKEELVDGVKNGDFTLELDFEPF
NASVPRPTLPKYIGDGVEFLNRHLSAKLFHEKDSLLPLLKFLQLHSHQGKNLMLNEKIQNLNALQHILRK
AEEYLAELSPETPYEDFEAKFEEIGLERGWGNNAERVLDMIRLLLDLLEAPDPCTLETFLGRIPMVFNVV
ILSPHGYFAQDNVLGYPDTGGQVVYILDQVRALETEMLQRIKQQGLNFTPRILILTRLLPDAVGTTCGER
LERVDGSEYCDILRVPFRTEKGIVRKWISRFEVWPYLETYTEDAAVELAKELKGKPDLIIGNYSDGNLVA
SLLAHKLGVTQCTIAHALEKTKYPDSDIYWKKLDDKYHFSCQFTADLFAMNHTDFIITSTLQEIAGSKDT
VGQYESHTAFTLPGLYRVVHGIDVFDPKFNIVSPGADMSIYFPYTEEKRRLTKFHPEIEELLYSDVENQE
HLCVLKDKKKPILFTMARLDRVKNLSGLVEWYGKNKRLRELVNLVVVGGDRRKESKDNEEKAEMKKIYGL
IDEYKLNGQFRWISSQMNRVRNGELYRYICDTKGAFVQPALYEAFGLTVVEAMTCGLPTFATCKGGPAEI
IVHGKSGFHIDPYHGDQAADTLADFFTKCKKDPSHWDQISKGGLQRIEEKYTWQIYSQRLLTLTGVYGFW
KHVSNLDRLESRRYLEMFYALKYRPLAKAVPLAEEE
>BjuSUS03
MVNGVLTRVHSQRERLNETLVAQRNEVLALLSRVEAKGKGILQQNQIVAEFEALPEETQKKIEGGAFFDL
LKTTQEAIVLPPWVALAVRPRPGVWEYIRVNLHALVVEELTPAEFLHFKEELVDGVKNGDFTLELDFEPF
NASVPRPTLPKYIGDGVEFLNRHLSAKLFHDKESLLPLLKFLRLHSHQGKTLMLNERVQNLNSLQHILRK
AEEYLAGLSPETPYEDFEAKFEEIGLERGWGNNAERVLDMIRLLLDLLEAPDPCTLENFLGRVPMVFNVV
ILSPHGYFAQDNVLGYPDTGGQVVYILDQVRAMETEMLQRIQQQGLNITPRILILTRLLPDAVGTTCGER
LERVDGSEYCDILRVPFRTEKGIVRKWISRFEVWPYLETYTEDAAVELAKELKGKPDLIIGNYSDGNLVA
SLLAHKLGVTQCTIAHALEKTKYPDSDIYWKKLDDKYHFSCQFTADLFAMNHTDFIITSTLQEIAGSKDT
VGQYESHTAFTLPGLYRVVHGIDVFDPKFNIVSPGADMSIYFPYTEEKRRLTKFHPEIEELLYSNVENEE
HLCVLKDKKKPILFTMARLDRVKNLSGLVEWYGKNKRLRELVNLVVVGGDRRKDSKDNEEKAEMKKMYDL
IEEYKLNGQFRWISSQMNRVRNGELYRYICDTKGAFVQPALYEAFGLTVVEAMTCGLPTFATCKGGPAEI
IVHGKSGFHIDPYHGDQAADTLADFFTKCKEDPSHWDQISKGGLQRIEEKYTWQIYSQRLLTLTGVYGFW
KHVSNLDRLESRRYLEMFYALKYRPLAQAVPLAQE
>BjuSUS04
MVNGVLTRVHSQRERLNQTLVAQRNEVLALLSRVEAKGKGILQQNQIIAEFEALPVETQKKIEGGAFFDL
LKTTQEAIVLPPWVALAVRPRPGVWEYIRVNLHALVVEELQPAEFLHFKEELVDGVKNGDFTLELDFEPF
NASVPRPTLPKYIGDGVEFLNRHLSAKLFHDKESLLPLLKFLRLHSHQGKTLMLNERVENLNTLQHILRK
AEEYLSGLSPETPYEDFEAKFEEIGLERGWGNNAERVLDMIRLLLDLLEAPDPCTLENFLGRVPMVFNVV
ILSPHGYFAQDNVLGYPDTGGQVVYILDQVRALETEMLQRIKQQGLNITPRILILTRLLPDAVGTTCGER
LERVDGSEYCDILRVPFRTEKGIVRKWISRFEVWPYLETYTEDAAVELAKELKGKPDLIIGNYSDGNLVA
SLLAHKLGVTQFTADLFAMNHTDFIITSTLQEIAGSKDTVGQYESHTAFTLPGLYRVVHGIDVFDPKFNI
VSPGADMSIYFPYTEEKRRLTKFHPEIEELLYSNVENEEHLCVLKDKKKPILFTMARLDRVKNLSGLVEW
YGKNKRLRELVNLVVVGGDRRKESKDNEEKAEMKKMYDLIDEYKLNGQFRWISSQMNRVRNGELYRYICD
TKGAFVQPALYEAFGLTVVEAMTCGLPTFATCKGGPAEIIVHGKSGFHIDPYHGDQAADTLADFFTKCKE
DPSHWDQISKGGLQRIEEKYTWQIYSQRLLTLTGVYGFWKHVSNLDRLESRRYLEMFYALKYRPLAQAVP
LAQE
>BjuSUS05
MPTGRFETMREWVHDAISAQRNELLSLFSRYVAQGKGILQSHQLIDEFLKTVKVDGTTEDLKNRPFMKVL
QSAEEAIVLPPFVALAIRPRPGVREYVRVNVYELSVDHLTVSEYLRFKEELVNGHANGNYLLELDFEPFN
ATFPRPTRSSSIGNGVQFLNRHLSSIMFRNKDSLEPLLDFLRTHKHDGRAMMLNDRILNIRTLQEALARA
EEFLSKLPLATPYSEFEFELQGMGFERGWGDTSQKVSEMVHLLLDILQAPDPSVLETFLGRIPMVFNVVI
LSPHGYFGQANVLGLPDTGGQVVYILDQVRALESEMLLRIQKQGLDVTPKILIVTRLIPEAEGTTCNQRL
EKVSGTEHAHILRIPFRTEKGILRKWISRFDVWPYLETFAEDASNEIAAELQGVPNLIIGNYSDGNLVAS
LLACKLGVIQCNIAHALEKTKYPESDIYWRNHEDNYHFASQFTADLIAMNNADFIITSTYQEIAGSKNKV
GQYESHTAFTLPGLYRVVHGINVFDPKFNIVSPGADMTIYFPYSDTERRLTALHESIEELLFSSEQNVEH
VGFLSDQTKPIIFSMARLDRVKNLTGLVECYAKNGKLREVANLVVVGGYVDVNQSRDREEMAEIQKMHSL
IKQYGLHGEFRWIAAQMNRARNGELYRYIADTKGVFVQPAFYEAFGLTVVESMTCGLPTFATCHGGPAEI
IENGVSGFHIDPYHPEQVATTLVSFFETCNADPSHWEKISDGGLKRIYERYTWKKYSERLLTLAGVYSFW
KHVSKLERRETRRYLEMFYSLKFRDLANSIPLATDEH
>BjuSUS06
MPTGRFETMREWVHDAISAQRNELLSLFSRYVAQGKGILHPHQLIDEFLKTVKVDGTTDDLKNRPFMKVL
QSAEEAIVLPPFVALAIRPRPGVREYVRVNVYELSVDHLTVSEYLRFKEELVNGHANGNYLLELDFEPFN
ATFPRPTRSSSIGNGVQFLNRHLSSIMFRNKDSLEPLLEFLRTHKHDGRAMMLNDRIQNIRTLQEALARA
EEFLSKLPLATPFSEFEFELQGMGFERGWGDTAQKVSEMVHLLLDILQAPDPSVLETFLGMIPMVFNVVI
LSPHGYFGQANVLGLPDTGGQVVYILDQVRALESEMLLRIQKQGLDVTPKILIVTRLIPEAEGTTCNQRL
EKVSGTEHAHILRIPFRTEKGILRKWISRFDVWPYLETFAEDASNEISAELQGVPNLIVGNYSDGNLVAS
LLACKLGVIQCNIAHALEKTKYPESDIYWRNHEDKYHFSSQFTADLIAMNNADFIITSTYQEIAGSKNKV
GQYESHTAFTLPGLYRVVHGIDVFDPKFNIVSPGADMTIYFPYSDKERRLTALHESIEELLFSSEQNVEH
VGFLSDQLKPIIFSMARLDRVKNLTGLVECYAKNIKLREVANLVVVGGYVDVNQSRDREEMAEIEKMHSL
IKHYGLHGEFRWIAAQMNRARNGELYRYIADTKGVFVQPAFYEAFGLTVVESMTCGLPTFATCHGGPAEI
IENGVSGFHIDPYHPEQVAATLVSFFETCNADPSHWEIISDGGLKRIYERYTWKKYSERLLTLAGVYSFW
KHVSKLERRETRRYLEMFYSLKFRDLANSIPLATDEH
>BjuSUS07
MSNPKLTRILSMRDRVQDTLSAHRNELVALLSRYVDQGKGILQPHNLIDELESIIGDDDARKKSLSDGPF
GEILKSAMEAIVIPPFVALAVRPRQGVWEYVRVNVYELSVEQLTVSEYLCFKEELVDGASSSDPFRLELD
FEPFNANVPRPSRSSSIGNGVQFLNRHLSSVMFRNKDCLEPLLDFLRVHKYKGHPLMLNDRIQSIYRLQS
QLSKAEDHISKLPEETPFSEFEYSIQGMGFEKGWGDTAARVLEMMYLLSDILQAPDPSSLEKFLGMVPMV
FNVVILSPHGYFGQANVLGLPDTGGQVVYILDQVRALETEMLLRIKRQGLDITPRILIVTRLIPDAKGTT
CNQRLERVSGTEHTHILRVPFRSDKGILRKWISRFDVWPYLENYAQDAASEIVGELRGVPDFIIGNYSDG
NLVASLMAHKMGVTQCTIAHALEKTKYPDSDIYWKDFDNKYHFSCQFTADLIAMNNADFIITSTYQEIAG
TKNTVGQYESHGAFTLPGLYRVVHGIDVFDPKFNIVSPGADMTIYFPFTESEKRLTALHGSIEEMLYSPE
QTDEHVGTLSDRSKPLLFSMARLDKVKNISGLVEMYGKNTKLRELVNLVVIAGNIDVTKSKDREEISEIE
KMHGLIKNYKLEGQFRWITAQTNRARNGELYRYIADTKGAFAQPAFYEAFGLTVVEAMTCGLPTFATLHG
GPAEIIEHGVSGFHIDPYHPEQAGNIMAEFFQRCKEDPNHWNKVSDSGLQRIYERYTWKIYSERLMTLAG
VYGFWKYVSKLERRETRRYLEMFYILKFRDLV
>BjuSUS08
MTNPRLTRILSTRERVQDTLSAHRNELVALLSRYVDQGKGILQPHNLIDQLESIIGDDDARKKSLSDGPF
GEILKSAMEAIVIPPFVALAVRPRQGVWEYVRVNVYELSVEQLIVSEYLRFKEELVDGPSSDDPFRLELD
FEPFNANVPRPSRSSSIGNGVQFLNRHLSSVMFRNKDCLEPLLDFLRVHKYKGHPLMLNDRIQSISRLQS
QLSKAEDHISKLPEETPFSEFEYSIQGMGFEKGWGDTAGRVLEMMYLLSDILQAPDPSSLEKFLGMVPMV
FNVVILSPHGYFGQANVLGLPDTGGQVVYILDQVRALETEMLLRTKRQGLDITPRILIVTRLIPDAKGTT
CNQRLERVSGTEHTHILRVPFRSDKGMLRKWISRFDIWPYLENYAQDAASEIIGELQGVPDFIIGNYSDG
NLVASLMAHKMGVTQCTIAHALEKTKYPDSDIYWKDFDNKYHFSCQFTADLIAMNNADFIITSTYQEIAG
TKNTVGQYESHGAFTLPGLYRVVHGIDVFDPKFNIVSPGADMTIYFPFTEKAKRLTALHGSIEEMLYSPE
QTDEHVGTLSDRSKPLLFSMARLDKVKNISGLVEMYGKNTKLRELVNLVVIAGNIDVDKSKDREEISEIE
KMHNLMKTYKLEGQFRWITAQTNRARNGELYRYIADTKGAFAQPAFYEAFGLTVVEAMTCGLPTFATLHG
GPAEIIEHGVSGFHIDPYHPEQAGNIMAEFFQRCKEDPNHWNRVSDAGLQRIYERYTWKIYSERLMTLAG
VYGFWKYVSKLERRETRRYLEMFYILKFRDLVKTVPLSDDE
>BjuSUS09
MEMTSGLLGNGIPEAMGQNRGNIKRCLEKYIEKGRRLLKLNQLMDEMEIVINDLVQRKQVMEGDLGKILC
FTQEAAVIPPNVAFAVRGNPGNWQYVKVNSSDLSVEALSNTQYLRLKELLFDENWAKDENALEVDFGALD
FTLPRLSLSSSVGNGMSFVSSKLGGRLNDNPQSLVDYLLSLEHQGENLMMNETLNTARKLEMSLILADVF
LSELPKETPFQAFELRFKEWGFEKGWGENAGKVKETMRILSEILQAPDPLNIDRFFSRIPRIFNVVIFSI
HGYFGQNDVLGLPDTGGQVVYILDQVKALEDELLHRINSQGLNFKPQILVVTRLIPDAKDTKCNQELEPI
TGTKHSNILRIPFVTENGILRRWVSRFDIYPYLEKFTKDATTKILDILEGKPDLVIGNYTDGNLVASLMA
NKLGITQATIAHALEKTKYEDSDNKWKEFDPKYHFSSQFTADLISMNSADFIIASTYQEIAGSKERAGQY
ESHMSFTLPGLYRVVSGINVFDPRFNIAAPGADDSIYFPFTSQDRRFTKFHPSIEELLYSQNENDEHIGY
LVDKKKPIIFSMARLDVVKNLTGLTEWYAKNKRLRDLVNLVIVGGFFDPSKSKDREEISEIKKMHSLIEK
YQLKAMSCGLVTFATNQGGPAEIIMDGVSGFHIDPSDGEESSDKIADFFEKCNIDPNYWNLFSAEGLQRI
YECYTWKIYANKLINMGSTYSYWRHLNKDQKLAKQRYIHSFYNLQYKSLVKIIPIVSDIPQPPPPPPKPL
VKPSATRGSKRTQSRLSFRLFGA
>BjuSUS10
MEGDLGKILCFTQEAAVIPPNVAFAVRGNPGNWQYVKVNSSDLSVEALSNTQYLRLKELLFDENWAKDEN
ALEVDFGALDFTLPRLSLSSSVGNGMSFVSSKLGGRLNDNPQSLVDYLLSLEHQGENLMMNETLNTARKL
EMSLILADVFLSELPKETPFQAFELRFKEWGFEKGWGENAGKVKETMRILSEILQAPDPLNIDRFFSRIP
RIFNVVIFSIHGYFGQNDVLGLPDTGGQVVYILDQVKALEDELLHRINSQGLNFKPQILVVTRLIPDAKD
TKCNQELEPITGTKHSNILRIPFVTDDATTKILDILEGKPDLVIGNYTDGNLVASLMANKLGITQATIAH
ALEKTKYEDSDNKWKEFDPKYHFSSQFTADLISMNSADFIIASTYQEIAGSKERAGQYESHMSFTLPGLY
RVVSGINVFDPRFNIAAPGADDSIYFPFTSQDRRFTKFHPSIEELLYSQNENDEHIGYLVDKKKPIIFSM
ARLDVVKNLTGLTEWYAKNKRLRDLVNLVIVGGFFDPSKSKDREEISEIKKMHSLIEKYQLKGQFRWIAA
QTDRTRNGELYRCIADTRGAFVQPAHYEAFGLTVIEAMSCGLVTFATNQGGPAEIIVDGVSGFHIDPSDG
EESSDKIADFFEKCNIDPNYWNLFSAEGLQRIYECYTWKIYANKVINMGSTYSYWRHLNKDQKLAKQRYI
HSFYNLQYRSLVKTIPIVSDIPQPPPPPPKPLVKSSATRSSKRTQSRLSFRLFGA
>BjuSUS11
MASASSPAMLQRSDSIADKMPDALKQSRYHMKRCFASFVKGGKRLMKRENLMNEIEKCIEDSLERKKIME
GLFGYILSCTQEAAVVPPFVALAARPNPGFWEYVKVNAGDLTVDEITATDYLKLKETVFDESWANDENAL
EIDFGAIDFTTPRLTLPTSIGNGADYISKFMSSKLGGKSDKLEPLLNYLLSLNHHGENLMINEDLNTVTK
LQKSLMLAVNVVSTYPKHTPYETFSQRLPTVFNVVIFSVHGYFGQQDVLGLPDTGGQVVYILDQVRALEE
ELLIRINQQGLGFKPQILVVTRLIPEARGTKCDQELEAIEGTKHSHILRVPFVTEKGVLRQWVSRFDIYP
YLERFTQDATSKILQRFDCKPDLIIGNYTDGNLVASLMATKLGVTQGTIAHALEKTKYEDSDAKWKELDP
KYHFSCQFTADLIAMNVTDFIITSTYQEIAGSKERPGQYESHTAFTMPGLCRVVSGIDVFDPKFNIAAPG
ADQSVYFPYTETQKRLTKFHPSIQELLYNEKDNQEHMGYLAEREKPIIFSMARLDIVKNITGLVEWYGKD
KRLREMANLVVVAGFFDMSKSNDREEKAEIKKMHDLIEKYKLKGSFRWIAAQTDRYRNSELYRCIADTKG
VFVQPALYEAFGLTVIEAMNCGLPTFATNQGGPAEIIVDGVSGFHIDPNNGDESVAKIGDFFSKCGTDGL
YWDTISKGGLKRIYECYTWKIYAEKLLKMGSMYGFWRQVNEDQKKAKQRYIEMFYNLQFKQLESKDGQEH
NESTVGGEVREGLLAAEASEKMKKVIETSEETQRLEKMKIAYGQQQQHQGVSTVRNLFWSVVVCLYIFYV
LKQRFFGTYSVQED
>BjuSUS12
MASASSPAMLQRADSIADKMPDALRQSRYHMKRCFASFVKGGKKLMKRENLMNEIEKCIEDSLERKKIME
GLFGYILTCTQEAAVVPPFVALAARPNPGFWEYVKVNSGDLKVDEITATDYLKLKESVFDESWAKDENAL
ELDFGAIDFTTPRLNLPSSIGNGADYISKFISSKLGGKSDKLEPLLNYLLSLNHHGENLMISDDLNTVSK
LQRSLMLAVNIVSTYPKHTPYETFSQRLKEMGFEKGWGNTSERVKETMVMLSEVLEAPDSVKLDLLFSRL
PTVFNVVIFSVHGYFGQQDVLGLPDTGGQVVYILDQVRALEEELLIRINQQGLGFKPQILVVTRLIPEAR
GTKCDQELEAIEGTKHSHILRVPFVTEKGTLRQWVSRFDIYPYLERFTQDATSKILQRFDCKPDLIIGNY
TDGNLVASLMATKLGVTQGTIAHALEKTKYEDSDAKWKELDPKYHFSCQFTADLIAMNVTDFIITSTYQE
IAGSKERPGQYESHTAFTMPGLCRVISGIDVFDPKFNIAAPGADQSVYFPYTETQKRLTKFHPSIQELLY
NEKDNAEHMGYLAEREKPIIFSMARLDTVKNITGLVEWYGKDKRLREMANLVVVAGFFDMSKSNDREEKA
EIKKMHDLIEKYKLKGSFRWIAAQTDRYRNSELYRCIADTKGVFVQPALYEAFGLTVIEAMNCGLPTFAT
NQGGPAEIIVDGVSGFHIDPNNGDESVNRIGDFFSKCGTDGLYWDTISKAGLKRIYECYTWKIYAEKLLK
MGSMYGFWRQVNEDQKKAKQRYIEMFYNLQFKQLKEVAKTEKLKQETKDGRQEHNESKGGGEVREGSLAA
EASERKVLETSEETQMLEKMKMPCRLQQNQGVSSVRNLVWSVVVCLYIFYVLKQRFFGTYSVQED
>BjuSUS13
MASSSSPTTLPRSDSIADKMPDALKQSRYHMKRCFASFVRGGKKLMKRENLMNEIEKCIEDGLDRKKIME
GLFGYILTCTQEAAVVPPYVALAARPDPGFWEYVKVNAGDLTVDEITATDFLKLKESVFDESWAKDENAL
ELDFGAIDFTTPRLNLSSSIGNGADYISKFISSKLGGNTDKLQPLLNYLLRLNHHGENLMINEVINTVAK
LQKSLMLAVNVVSTYPKHTPCETFAPRLKEMGFEKGWGNTSERVKETMVMLSEVLEAPDSVKLDLLFSRL
PTVFNVVIFSVHGYFGQKDVLGLPDTGGQVVYILDQVRALEEELLIRINQQGLGFKPQILVVTRLIPEAR
GTKCDQELEAIEGTKHSHILRVPFVTDKGTLRQWVSRFDIYPYLERFTQDATTKILQRFECKPDLIIGNY
TDGNLVASLMATKLGVTQGTIAHALEKTKYEDSDAKWKELDPKYHFSCQFTADLIAMNVTDFIITSTYQE
IAGSKERPGQYESHTAFTMPGLCRVVSGIDVFDPKFNIAAPGADQSVYFPYTEKQKRLTKFHPSIQELLY
NEKDNQEHMGYLAEREKPIIFSMARLDTVKNITGLVEWYGKDKRLREMANLVVVAGFFDMSKSNDREEKA
EIKKMHDLIEKYNLKGKFRWIAAQTDRYRNSELYRCIADTKGVFVQPALYEAFGLTVIEAMNCGLPTFAT
NQGGPAEIIVDGVSGFHIDPNNGDESVARIGDFFSKCSTDGLYWDSISKAGLKRIYECYTWKIYAEKLLK
MGSIYGFWRQVNEDQKKAKQRYIDMLYNLQFKPLKEVTETKPKSKDGQERDDVKAGEGEVKEGLLAAEAS
ERIKKVVETSEETQRLEKMKIAYGQQRNQGGSSVRNLFLSVVVCLYICYTLKQRFFGTYSVQED
>BjuSUS14
MASSSSPTTLQRSDSIADKMPDALKQSRYHMKRCFASFVKGGKKLMKRENLMNEIEKCIEDSNDRKKIME
GLFGYILTCTQEAAVVPPFVALAARPDPGFWEYVKVNAGDLSVDEITATDYLKLKESVFDESWAKDENAL
ELDFGAIDFTTPRLNLSSSIGNGADYISKFISSKLGGNTDKLEPLLNYLLRLNHHGENLMINEGINTVAK
LKKSLMLAVNVVSTYPKHTPYETFSPRLKEMGFEKGWGNTSERVRETMVMLSEVLEAPDSVKLDLLFSRL
PTVFNVVIFSVHGYFGQQDVLGLPDTGGQVVYILDQVRALEEELLIRINQQGLGFKPQILVVTRLIPEAR
GTKCDQELEAIEGTKHSHILRVPFVTDKGTLRQWVSRFDIYPYLERFTQDATSKILQRFECKPDLIIGNY
TDGNLVASLMATKLGVTQGTIAHALEKTKYEDSDAKWKELDPKYHFSCQFTADLIAMNVTDFIITSTYQE
IAGSKERPGQYESHTAFTMPGLCRVVSGIDVFDPKFNIAAPGADQSVYFPYTETPKRLTKFHPSIQELLY
NEKDNNEHMGYLAEREKPIIFSMARLDTVKNITGLVEWYGKDKRLREMANLVVVAGFFDMSKSNDREEKA
EIKKMHDLIEKYNLKGKFRWIAAQTDRYRNSELYRCIADTKGVFVQPALYEAFGLTVIEAMNCGLPTFAT
NQGGPAEIIVDGVSGFHIDPNNGDESVARIGDFFSKCSTDGLYWDTISKAGLKRIYECYTWKIYAEKLLK
MGSIYGFWRQVNEDQKKAKQRYIDMLYNLQFKPLKEVTETKPKSKDGQERDDVKAGEGEVKEGLLAAEAS
ERIKKVVETSEETQRLEKMKIAYGQQRNQGGSSVRNLFLSVVVCLYICYTLKQRFFGTYSVQED
>BvSUS1
MAPKLTRIPSMRERVEDTLSVHRNELVSLLSKYVAQGKCLLQPHHLIDGLESVIGEDKGKQILSDGPFSE
VLRSAQEAIVVPPFVAIAVRPRPGVWEYVRVNVSELNVEQLTVSEYLHFKEELVDGKADDHYVLELDFEP
FNESVPRPTRSSSIGNGVQFLNRHLSSSMFRNKDCLEPLLDFLRVHKHKGVVMMLNDRIQTIQRLQSALS
KAEDYLIKLPADTPYSEFEFVIQGMGFERGWGDTAERVLEMMHLLLDILQAPDPSTLETFLGRLPMVFNV
VILSVHGYFGQAHVLGLPDTGGQIVYILDQVRSLEHEMLQRIKKQGLDVTPRILIVSRLIPDAKGTTCNQ
RMEKVSGTEHASILRVPFRSEKGILRKWISRFDVWPYLENFTEDAAGEIIGELQGRPDLIIGNYSDGNIV
ASLLSHKMGVTQCNIAHALEKTKYPDSDIYWKRFEDKYHFSCQFSADLMAMNHADFIITSTYQEIAGTKN
TVGQYESHKAFTFPGLYRVVHGIDVFDPKFNIVSPGADMAIYFPFSEKEHRLTSLHSFIEQLLFKPEQNE
EHIGVLDDTSKPIIFSMARLDRVKNITGLVECYGKNAKLRELANLVVVAGYNDVKKSNDREEIAEIEKMH
RLIQEYNLRGQFRWIASQTNRVRNGELYRYICDKGGIFAQPAFYEAFGLTVVEAMTCGLPTFATCHGGPA
EIIEDGVSGFHIDPYHADQAAEKMTEFFVKCREDPNYWTKISAGGLLRIKERYTWQKYSERLMTLAGVYG
FWKYVSKLERRETRRYLEMFYILKFRDLANSVPLATDEEPSTTDAVATFRGP
>BvSUS2
MASRLTRVPSLKERLDETLTAQRNEIISFLSKIASHGKGILQPHEVLSEFEAVADKHKLADGPFGEVLRH
TQETIVLPPWITLAVRPRPGIWEYIRVNVDALAVEELTPSQFLHVKEELVDGSTNGNFVLELDFEPFTAS
FPRPTLSKSIGNGVEFLNRHLSAKMFHDKESMRPLLDFLRMHHYKGKTIMLNDRIQNLDSLQAVLRKAEE
FLTTIPADTPYSEFDHKFQEIGLERGWGDNAERVMDMIQLLLDLLEAPDSCTLEKFLGRIPMVFNVVILT
PHGYFAQANVLGYPDTGGQVVYILDQVRALEHEMLLRIKQQGLDIIPRILIVSRLLPDAVGTTCGQRLEK
VFGTEHSHILRVPFRTEKGIVRRWISRFEVWPYLETYTEDVANEIAGELQAKPDLIIGNYSDGNIVASLL
AHKLGVTQCTIAHALEKTKYPNSDIYWKSFEEKYHFSCQFTADLIAMNHTDFIITSTFQEIAGNKDTVGQ
YESHMAFTLPGLYRVVHGIDVFDPKFNIVSPGADLSIYFNYTEEKKRLTALHPEIEELLFSETQNEEHIC
VLKDRKKPIIFSMARLDRVKNMTGLVEWYGKNKKLRELVNLVVVAGDRRKESKDTEEKEEMKKMYSLIEE
YNLNGQFRWISAQMNRVRNGELYRYIADTRGAFVQPAYYEAFGLTVVEAMTCGLPTFATCHGGPAEIIVH
GKSGFHIDPYHGDKAADLLVDFFEKSTADPSYWENISKGGLQRIEEKYTWKIYSDRLLTLAGVYGFWKYV
SNLDRREARRYLEMFYALKYKKLAESVPLAIEDAN
>StSUS1
MSNPKFTRVPSMRERVEDTLSAHRNQLVALLSRYVAQGKGILQPHHLIDEFNSAVCDDTACEKLKEGPFC
EILKSTQEAIVLPPFVAIAVRPRPGVWEYVRVNVYDLSVEQLTIPEYLRFKEELVDGEDNNLFVLELDFE
PFNASVPRPSRSSSIGNGVQFLNRHLSSNMFRSKESLDPLLDFLRGHNHKGNVLMLNERIQRISRLESSL
NKADDYLSKLPPDTPYTEFEYALQEMGFEKGWGDTAKRVLETMHLLSDILQAPDPSTLETFLGRLPMVFN
VVILSPHGYFGQANVLGLPDTGGQVVYILDQVRALEAEMLLRIKQQGLNFKPKILVVTRLIPDAKGTTCN
QRLERISGTEYSHILRVPFRTENGILHKWISRFDVWPYLEKFTEDVAGEMSAELQGVPDLIIGNYSDGNL
VASLLAYKMGVTQCTIAHALEKTKYPDSDIYWKKFEEKYHFSCQFTADLLSMNHSDFIITSTYQEIAGTK
NTVGQYESHTAFTLPGLYRVVHGIDVFDPKFNIVSPGADMTIYFPYSDKEKRLTSLHPSIEKLLFDPEQN
EVHIGNLNDQSKPIIFSMARLDRVKNITGLVECYAKNATLRELANLVVVAGYNDVKKSNDREEIAEIEKM
HALMKEHNLDGQFRWISAQMNRARNGELYRYIADKRGIFVQPAFYEAFGLTVVEAMTCGLPTFATCHGGP
MEIIQDGVSGYHIDPYHPNKAAELMVEFFQRCEQNPTHWENISASGLQRILDRYTWKIYSERLMTLAGVY
GFWKLVSKLERRETRRYLEMFYILKFRELVKSVPLAIDDKH
>StSUS2
MAERVLTRVHSLRERLDATLAAHRNEILLFLSRIESHGKGILKPHQLLAEFESIHKEDKDKLNDHAFEEV
LKSTQEAIVLPPWVALAIRLRPGVWEYVRVNVNALIVEELTVPEFLQFKEELVNGTSNDNFVLELDFEPF
TASFPKPTLTKSIGNGVEFLNRHLSAKMFHDKESMTPLLEFLRVHHYKGKTMMLNDRIQNLYTLQKVLRK
AEEYLTTLSPETSYSAFEHKFQEIGLERGWGDTAERVLEMICMLLDLLEAPDSCTLEKFLSRIPMVFNVV
ILSPHGYFAQENVLGYPDTGGQVVYILDQVPALEREMLKRIKEQGLDIKPRILIVTRLLPDAVGTTCGQR
LEKVFGTEHSHILRVPFRTEKGIVRKWISRFEVWPYMETFIEDVGKEITAELQAKPDLIIGNYSEGNLAA
SLLAHKLGVTQCTIAHALEKTKYPDSDIYLNKFDEKYHFSAQFTADLIAMNHTDFIITSTFQEIAGSKDT
VGQYESHMAFTMPGLYRVVHGIDVFDPKFNIVSPGADVNLYFPYSEKEKRLTTFHPEIEDLLFSDVENEE
HLCVLKDRNKPIIFTMARLDRVKNLTGLVEWYAKNPRLRELVNLVVVGGDRRKESKDLEEQAEMKKMYEL
IKTHNLNGQFRWISSQMNRVRNGELYRYIADTRGAFVQPAFYEAFGLTVVEAMSCGLPTFATNQGGPAEI
IVHGKSGFQIDPYHGEQAADLLADFFEKCKVDPSHWEAISEGGLKRIQEKYTWQIYSDRLLTLAAVYGFW
KHVSKLDRLEIRRYLEMFYALKFRKLAQLVPLAVE
>StSUS3
MAERVLTRVHSLRERLDATLAAHRNEILLFLSRIESHGKGILKPHQLLAEFESIHKEDKDKLNDHAFEEV
LKSTQEAIVLPPWVALAIRLRPGVWEYVRVNVNALIVEELTVPEFLQFKEELVNGTSNDNFVLELDFEPF
TASFPKPTLTKSIGNGVEFLNRHLSAKMFHDKESMTPLLEFLRVHHYKGKTMMLNDRIQNLYTLQKVLRK
AEEYLTTLSPETSYSAFEHKFQEIGLERGWGDTAERVLEMICMLLDLLEAPDSCTLEKFLGRIPMVFNVV
ILSPHGYFAQENVLGYPDTGGQVVYILDQVPALEREMLKRIKEQGLDIKPRILIVTRLLPDAVGTTCGQR
LEKVFGTEHSHILRVPFRTEKGIVRKWISRFEVWPYMETFIEDVGKEITAELQAKPDLIIGNYSEGNLAA
SLLAHKLGVTQCTIAHALEKTKYPDSDIYLNKFDEKYHFSAQFTADLIAMNHTDFIITSTFQEIAGSKDT
VGQYESHMAFTMPGLYRVVHGIDVFDPKFNIVSPGADVNLYFPYSEKEKRLTTFHPEIEDLLFSDVENEE
HLCVLKDRNKPIIFTMARLDRVKNLTGLVEWYAKNPRLRELVNLVVVGGDRRKESKDLEEQAEMKKMYEL
IKTHNLNGQFRWISSQMNRVRNGELYRYIADTRGAFVQPAFYEAFGLTVVEAMSCGLPTFATNQGGPAEI
IVHGKSGFQIDPYHGEQAADLLADFFEKCKVDPSHWEAISEGGLKRIQEKYTWQIYSDRLLTLAAVYGFW
KHVSKLDRLEIRRYLEMFYALKFRKLAQLVPLAVE
>StSUS4
MAERVLTRVHSLRERVDATLAAHRNEILLFLSRIESHGKGILKPHELLAEFDAIRQDDKNKLNEHAFEEL
LKSTQEAIVLPPWVALAIRLRPGVWEYIRVNVNALVVEELSVPEYLQFKEELVDGASNGNFVLELDFEPF
TASFPKPTLTKSIGNGVEFLNRHLSAKMFHDKESMTPLLEFLRAHHYKGKTMMLNDRIQNSNTLQNVLRK
AEEYLIMLSPDTPYFEFEHKFQEIGLEKGWGDTAERVLEMVCMLLDLLEAPDSCTLEKFLGRIPMVFNVV
ILSPHGYFAQENVLGYPDTGGQVVYILDQVPALEREMLKRIKEQGLDIIPRILIVTRLLPDAVGTTCGQR
IEKVYGAEHSHILRVPFRTEKGIVRKWISRFEVWPYMETFIEDVAKEISAELQAKPDLIIGNYSEGNLAA
SLLAHKLGVTQCTIAHALEKTKYPDSDIYWKKFDEKYHFSSQFTADLIAMNHTDFIITSTFQEIAGSKDT
VGQYESHMAFTMPGLYRVVHGINVFDPKFNIVSPGADINLYFSYSETEKRLTAFHPEIDELLYSDVENDE
HLCVLKDRTKPILFTMARLDRVKNLTGLVEWYAKNPRLRGLVNLVVVGGDRRKESKDLEEQAEMKKMYEL
IETHNLNGQFRWISSQMNRVRNGELYRYIADTKGAFVQPAFYEAFGLTVVEAMTCGLPTFATNHGGPAEI
IVHGKSGFHIDPYHGEQAADLLADFFEKCKKEPSHWETISTGGLKRIQEKYTWQIYSERLLTLAAVYGFW
KHVSKLDRLEIRRYLEMFYALKYRKMAEAVPLAAE
>SlSUS1
MAERVLTRVHRLRERVDATLCAHRNEILLFLSRIESHGKGILKPHELLAEFDAIRQDDKDKLNEHAFEEL
LKSTQEAIVLPPWVALAIRLRPGVWEYVRVNVNALVVEELSVPEYLQFKEELVDGASNGNFVLELDFEPF
TASFPKPTLTKSIGNGVEFLNRHLSAKMFHDKESMAPLLEFLRAHHYKGKTMMLNDRIHNSNTLQNVLRK
AEEYLIMLPPETPFFEFEHKFQEIGLEKGWGDTAERVLEMVCMLLDLLEAPDSCTLEKFLGRIPMVFNVV
ILSPHGYFAQENVLGYPDTGGQVVYILDQVPALEREMLKRIKEQGLDIIPRILIVTRLLPDAVGTTCGQR
LEKVYGTEHSHILRVPFGTEKGIVRKWISRFEVWPYMETFIEDVAKEISAELQAKPDLIIGNYSEGNLAA
SLLAHKLGVTQCTIAHALEKTKYPDSDIYWKKFDEKYHFSSQFTADLIAMNHTDFIITSTFQEIAGSKDT
VGQYESHMAFTMPGLYRVVHGINVFDPKFNIVSPGADINLYFPYSESEKRLTAFHPEIDELLYSDVENDE
HLCVLKDRTKPILFTMARLDRVKNLTGLVEWYAKNPRLRGLVNLVVVGGDRRKESKDLEEQAEMKKMYEL
IETHNLNGQFRWISSQMNRVRNGELYRYIADTKGAFVQPAFYEAFGLTVVEAMTCGLPTFATNHGGPAEI
IVHGKSGFHIDPYHGEQAADLLADFFEKCKKEPSHWETISTGGLKRIQEKYTWQIYSERLLTLAAVYGFW
KHVSKLDRLEIRRYLEMFYALKYRKMAEAVPLAAE
>SlSUS2
MAQRVLTRVHSLRERLDATLDAHRNEILLFLSRIESHGKGILKPHQLLAEFESIQKEDKDKLNDHAFEEV
LKSTQEAIVLPPWVALAIRLRPGVWEYVRVNVNALSVEELTVPEFLQFKEELVNGTSSDNFVLELDFEPF
TASFPKPTLTKSIGNGVEFLNRHLSAKMFHDKESMTPLLEFLRVHHYNGKSMMLNDRIQNLYTLQKVLRK
AEEYLTTLSPETSYSSFEHKFQEIGLERGWGDTAERVLEMICMLLDLLEAPDSCTLEKFLSRIPMVFNVV
IPSPHGYFAQENVLGYPDTGGQVVYILDQVPALEREMLKRIKEQGLDIKPRILIVTRLLPDAVGTTCGQR
LEKVFGTEHSHILRVPFRTEKGIVRKWISRFEVWPYMETFIEDVGKEITAELQAKPDLIIGNYSEGNLAA
SLLAHKLGVTQCTIAHALEKTKYPDSDIYLNKFDEKYHFSAQFTADLIAMNHTDFIITSTFQEIAGSKDT
VGQYESHMAFTMPGLYRVVHGIDVFDPKFNIVSPGADVNLYFPYSEKEKRLTTFHPEIEDLLFSDVENEE
HLCVLKDRNKPIIFTMARLDRVKNLTGLVEWYAKNPRLRELVNLVVVGGDRRKESKDLEEQAEMKKMYEL
IKTHNLNGQFRWISSQMNRVRNGELYRYIADTRGAFVQPAFYEAFGLTVVEAMSCGLPTFATNQGGPAEI
IVHGKSGFQIDPYHGEQAADLLAEFFEKCKVDPSHWEAISKGGLKRIQEKYTWQIYSDRLLTLAAVYGFW
KHVSKLDRLEIRRYLEMFYALKFRKLAELVPLAVE
>SlSUS3
MAQRVLTRVHSLRERLDATLDAHRNEILLFLSRIESHGKGILKPHQLLAEFESIQKEDKDKLNDHAFEEV
LKSTQEAIVLPPWVALAIRLRPGVWEYVRVNVNALSVEELTVPEFLQFKEELVNGTSSDNFVLELDFEPF
TASFPKPTLTKSIGNGVEFLNRHLSAKMFHDKESMTPLLEFLRVHHYNGKSMMLNDRIQNLYTLQKVLRK
AEEYLTTLSPETSYSSFEHKFQEIGLERGWGDTAERVLEMICMLLDLLEAPDSCTLEKFLSRIPMVFNVV
ILSPHGYFAQENVLGYPDTGGQVVYILDQVPALEREMLKRIKEQGLDIKPRILIVTRLLPDAVGTTCGQR
LEKVFGTEHSHILRVPFRTEKGIVRKWISRFEVWPYMETFIEDVGKEITAELQAKPDLIIGNYSEGNLAA
SLLAHKLGVTQCTIAHALEKTKYPDSDIYLNKFDEKYHFSAQFTADLIAMNHTDFIITSTFQEIAGSKDT
VGQYESHMAFTMPGLYRVVHGIDVFDPKFNIVSPGADVNLYFPYSEKEKRLTTFHPEIEDLLFSDVENEE
HLCVLKDRNKPIIFTMARLDRVKNLTGLVEWYAKNPRLRELVNLVVVGGDRRKESKDLEEQAEMKKMYEL
IKTHNLNGQFRWISSQMNRVRNGELYRYIADTRGAFVQPAFYEAFGLTVVEAMSCGLPTFATNQGGPAEI
IVHGKSGFQIDPYHGEQAADLLAEFFEKCKVDPSHWEAISKGGLKRIQEKYTWQIYSDRLLTLAAVYGFW
KHVSKLDRLEIRRYLEMFYALKFRKLAELVPLAVE
>SlSUS4
MSNPKLSRIPSMRERVEDTLSAHRNQLVALLSRYVAQGKGILQPHHLIDELNNAVCDDTACEKLKEGPFC
EILKSTQEAIVLPPFVAIAVRPRPGVWEYVRVNVYDLSVEQLTVPEYLRFKEELVDGEDHNHLFVLELDF
EPFNASVPRPSRSSSIGNGVQFLNRHLSSNMFRSNESLDPLLDFLRGHNHKGNVLMLNERIQRISRLESS
LNKADDYLSKLPPDTPYTDFEYALQEMGFEKGWGDTANRVLETMHLLSDILQAPDPSTLETFLGRLPMVF
NVVILSPHGYFGQANVLGLPDTGGQVVYILDQVRALEAEMLLRIKQQGLNFKPRILVVTRLIPDAKGTTC
NQRLERISGTEYSHILRVPFRTENGILHKWISRFDVWPYLEKFTEDVAGEMSAELQGVPDLIIGNYSDGN
LVASLLAYKMGITQCTIAHALEKTKYPDSDIYWKKFEEKYHFSCQFTADLLSMNHSDFIITSTYQEIAGT
KNTVGQYESHTAFTLPGLYRVVHGIDVFDPKFNIVSPGADMTIYFPYFDKEKRLTSLHPSIEKLLFDPEQ
NEVHIGSLNDQSKPIIFSMARLDRVKNITGLVECYAKNATLRELANLVVVAGYNDVKKSNDREEIAEIEK
MHALMKEHNLDGQFRWISAQMNRARNGELYRYIADKRGIFVQPAYYEAFGLTVVEAMTCGLPTFATCHGG
PMEIIQDGVSGYHIDPYHPNKAAELMVEFFQRCEQNPTHWENISASGLQRILDRYTWKIYSERLMTLAGV
YGFWKLVSKLERRETRRYLEMFYILKFRELVKSVPLAVDEKQ
>TaSUS1
MAAKLTRLHSLRERLGATFSSHPNELIALFSRYVHQGKGMLQRHQLLAEFDALFESDKEKYAPFEDILRA
AQEAIVLPPWVALAIRPRPGVWDYIRVNVSELAVEELTVSEYLAFKEQLVDEHASSKFVLELDFEPFNAS
FPRPSMSNSIGKRVQFLNRHLSSQLFQDKESLYPLLNFLKAHYYKGTTMMLNDRIQSLRGLQSALRKAEE
YLVSIPEDTPSSEFNHRFQELGLEKGWGDTAKRVHDTIHLLLDLLEAPDPASLEKFLGTIPMMFNVVILS
PHGYFAQSNVLGYPDTGGQVVYILDQVRALENEMLLRIKQQGLDITPKILIVTRLLPDAVGTTCGQRLEK
VIGTEHTDILRVPFRTDNGILRKWISRFDVWPYLETYTEDVANELMREMQTKPDFIIGNNSDGNLVATLL
AHKLGVTQCTIAHALEKTKYPNSDIYLDKFDSQYHFSCQFTADLIAMNHTDFIITSTFQEIAGSKDSVGQ
YESHIAFTLPDLYRVVHGIDVFDPKFNIVXPGADMTVYFPYTETDKRLTAFHSEIEELLYSDVENDEHKF
VLKDRNKPIIFSMARLDRVKNMTGLVEMYGKNAHLKGFGKLVIVAGDHGKESKDREEQAEFKRMYSLIEE
YKLKGHIRWISAQMNRVRNGELYRYICDTKGAFVQPAFYEAFGLTVIEVHECGLPTIATCHGGPAEIIVN
GVSGLHIDPYHSDKAADILVNFFEKCSEDPSYWDKMSEGGLKRIYEKYTWKLYSERLMTLTGVYGFWKYV
SNLERRETRRYLEMFYALKYRSLAAAVPLAVDGESSDN
>TaSUS2
MGETAGGRALSRIHSVRERIGDSLSAHTNELVAVFSRLVNQGKGMLQPHQITAEYNAAIPEAEREKLKDT
AFEDLLRGAQEAIVIPPWVALAIRPRPGVWEYVRVNVSELGVEELNVLNYLQFKEQLANGSIDNNFVLEL
DFEPFNASFPRPSLSKSIGNGVQFLNRHLSSKLFHDKESMYPLLNFLRAHNYKGMTMMLNDRIRSLGTLQ
GALRKAETHLSGLPADTPYSEFHHRFQELGLEKGWGDCAQRASETIHLLLDLLEAPDPSSLEKFLGTIPM
VFNVVILSPHGYFAQANVLGYPDTGGQVVYILDQVRAMENEMLLRIKQQGLDITPKILIVTRLLPDAHGT
TCGQRLEKVLGTEHTHILRVPFKTEDGIVRKWISRFEVWPYLEAYTDDVAHEIAGELQATPDLIIGNYSD
GNLVACSLAHKLGVTHCIAHALEKTKYPNSDLYWKKFEDHYHFSCQFTADLIAMNHADFIITSTFQEIAG
NKDTVGQYESHMAFTMPSLYRVVHGIDVFDPKFNIVSPGADMSIYFPYTEQQKRLTSLHTEIEELLFSDV
ENAEHKFVLKDKKKPIIFSMARLDRVKNMTGLVEMYGRNPRLQELVNLVVVCGDHGKVSKDKEEQAEFKK
MFDLIEQYNLIGHIRWISAQMNRVRNGELYRYICDMKGAFVQPAFYEAFGLTVIEAMTCGLPTFATAYGG
PAEIIVHGVSGYHIDPYQNDKASALLVDFFGKCQEDPSHWNKISQGGLQRIEEKYTWKLYSERLMTLSGV
YRFWKYVSNLDRRETRRYLEMLYALKYRKMAATVPLAVEGETSGK
>ZmSUS1
MAAKLTRLHSLRERLGATFSSHPNELIALFSRYVHQGKGMLQRHQLLAEFDALFDSDKEKYAPFEDILRA
AQEAIVLPPWVALAIRPRPGVWDYIRVNVSELAVEELSVSEYLAFKEQLVDGQSNSNFVLELDFEPFNAS
FPRPSMSKSIGNGVQFLNRHLSSKLFQDKESLYPLLNFLKAHNYKGTTMMLNDRIQSLRGLQSSLRKAEE
YLLSVPQDTPYSEFNHRFQELGLEKGWGDTAKRVLDTLHLLLDLLEAPDPANLEKFLGTIPMMFNVVILS
PHGYFAQSNVLGYPDTGGQVVYILDQVRALENEMLLRIKQQGLDITPKILIVTRLLPDAAGTTCGQRLEK
VIGTEHTDIIRVPFRNENGILRKWISRFDVWPYLETYTEDVSSEIMKEMQAKPDLIIGNYSDGNLVATLL
AHKLGVTQCTIAHALEKTKYPNSDIYLDKFDSQYHFSCQFTADLIAMNHTDFIITSTFQEIAGSKDTVGQ
YESHIAFTLPGLYRVVHGIDVFDPKFNIVSPGADMSVYYPYTETDKRLTAFHPEIEELIYSDVENSEHKF
VLKDKKKPIIFSMARLDRVKNMTGLVEMYGKNARLRELANLVIVAGDHGKESKDREEQAEFKKMYSLIDE
YKLKGHIRWISAQMNRVRNGELYRYICDTKGAFVQPAFYEAFGLTVIESMTCGLPTIATCHGGPAEIIVD
GVSGLHIDPYHSDKAADILVNFFDKCKADPSYWDEISQGGLQRIYEKYTWKLYSERLMTLTGVYGFWKYV
SNLERRETRRYIEMFYALKYRSLASQVPLSFD
>ZmSUS2
MGEGAGDRVLSRLHSVRERIGDSLSAHPNELVAVFTRLKNLGKGMLQPHQIIAEYNNAIPEAEREKLKDG
AFEDVLRAAQEAIVIPPWVALAIRPRPGVWEYVRVNVSELAVEELRVPEYLQFKEQLVEEGPNNNFVLEL
DFEPFNASFPRPSLSKSIGNGVQFLNRHLSSKLFHDKESMYPLLNFLRAHNYKGMTMMLNDRIRSLSALQ
GALRKAEEHLSTLQADTPYSEFHHRFQELGLEKGWGDCAKRAQETIHLLLDLLEAPDPSTLEKFLGTIPM
VFNVVILSPHGYFAQANVLGYPDTGGQVVYILDQVRAMENEMLLRIKQCGLDITPKILIVTRLLPDATGT
TCGQRLEKVLGTEHCHILRVPFRTENGIVRKWISRFEVWPYLETYTDDVAHEIAGELQANPDLIIGNYSD
GNLVACLLAHKMGVTHCTIAHALEKTKYPNSDLYWKKFEDHYHFSCQFTTDLIAMNHADFIITSTFQEIA
GNKDTVGQYESHMAFTMPGLYRVVHGIDVFDPKFNIVSPGADLSIYFPYTESHKRLTSLHPEIEELLYSQ
TENTEHKFVLNDRNKPIIFSMARLDRVKNLTGLVELYGRNKRLQELVNLVVVCGDHGNPSKDKEEQAEFK
KMFDLIEQYNLNGHIRWISAQMNRVRNGELYRYICDTKGAFVQPAFYEAFGLTVVEAMTCGLPTFATAYG
GPAEIIVHGVSGYHIDPYQGDKASALLVDFFDKCQAEPSHWSKISQGGLQRIEEKYTWKLYSERLMTLTG
VYGFWKYVSNLERRETRRYLEMLYALKYRTMASTVPLAVEGEPSSK
>ZmSUS3
MLQRHQLLAEFDALFDSDKEKYAPFEDILRAAQEAIVLPPWVALAIRPRPGVWDYIRVNVSELAVEELSV
SEYLAFKEQLVDGQSNSNFVLELDFEPFNASFPRPSMSKSIGNGVQFLNRHLSSKLFQDKESLYPLLNFL
KAHNYKGTTMMLNDRIQSLRGLQSSLRKAEEYLLSVPQDTPYSEFNHRFQELGLEKGWGDTAKRVLDTLH
LLLDLLEAPDPANLEKFLGTIPMMFNVVILSPHGYFAQSNVLGYPDTGGQVVYILDQVRALENEMLLRIK
QQGLDITPKILIVTRLLPDAAGTTCGQRLEKVIGTEHTDIIRVPFRNENGILRKWISRFDVWPYLETYTE
DVSSEIMKEMQAKPDLIIGNYSDGNLVATLLAHKLGVTQCTIAHALEKTKYPNSDIYLDKFDSQYHFSCQ
FTADLIAMNHTDFIITSTFQEIAGSKDTVGQYESHIAFTLPGLYRVVHGIDVFDPKFNIVSPGADMSVYY
PYTETDKRLTAFHPEIEELIYSDVENSEHKFVLKDKKKPIIFSMARLDRVKNMTGLVEMYGKNARLRELA
NLVIVAGDHGKESKDREEQAEFKKMYSLIDEYKLKGHIRWISAQMNRVRNGELYRYICDTKGAFVQPAFY
EAFGLTVIESMTCGLPTIATCHGGPAEIIVDGVSGLHIDPYHSDKAADILVNFFDKCKADPSYWDKISQG
GLQRIYEKYTWKLYSERLMTLTGVYGFWKYVSNLERRETRRYIEMFYALKYRSLVSRLMPASASASACQR
GSRVRSHSSSLKRVNELLTHLFLESRQARFRCPSISTGKEEEEEAQAGEPSPAFRSVSPQFALLVVYWSY
VYLVSKNFGSFSFFFLV

## Sheet: raw data sheet  2
Figure 7A
Expression patterns		stages(stem dilation at diffierent stges)	stage1(2cm)	stage2(4cm)	stage3(6cm)	stage4(8cm)
	BjuSUS01	rep1	6.22603	6.3234	2.73957	3.42904
		rep2	6.91043	7.91672	3.23692	3.78997
		rep3	6.11096	7.78908	3.28777	3.10272
	BjuSUS02	rep1	7.94475	8.36593	2.80903	3.70806
		rep2	7.37547	9.12756	3.13982	3.46577
		rep3	7.37378	9.11035	5.06575	3.53533
	BjuSUS03	rep1	10.288	9.85506	4.26013	5.16371
		rep2	9.07735	10.8126	5.15411	5.47982
		rep3	9.82905	10.9146	4.9366	5.28279
	BjuSUS04	rep1	9.98117	10.357	4.49888	6.35292
		rep2	10.4918	10.2982	4.63925	5.71868
		rep3	10.2856	10.393	6.12606	5.75858
	BjuSUS05	rep1	-6.64386	-6.64386	-6.64386	-6.64386
		rep2	-6.64386	-6.64386	-6.64386	-6.64386
		rep3	-6.64386	-5.14492	-6.64386	-6.64386
	BjuSUS06	rep1	-0.371661	-1.19619	-6.64386	-6.64386
		rep2	-4.11165	-1.79242	-6.64386	-6.64386
		rep3	-3.04691	-0.685488	-6.64386	-6.64386
	BjuSUS07	rep1	-6.64386	-6.64386	-0.592934	1.78504
		rep2	-6.64386	2.30579	-1.2481	1.78504
		rep3	-6.64386	-0.276186	2.33172	1.78504
	BjuSUS08	rep1	-6.64386	-2.52524	2.01722	2.75902
		rep2	-6.64386	3.76727	1.81582	2.38306
		rep3	-5.05404	0.935419	4.64266	2.88082
	BjuSUS09	rep1	-0.290179	-2.75412	-6.64386	-6.64386
		rep2	-2.08461	-2.27996	-3.55375	-3.08263
		rep3	-2.21252	-0.869958	-6.64386	-3.12942
	BjuSUS10	rep1	-6.64386	-6.64386	-6.64386	-6.64386
		rep2	-6.64386	-5.01647	-6.64386	-5.01178
		rep3	-3.94904	-6.64386	-6.64386	-6.64386
	BjuSUS11	rep1	-0.567019	-2.37561	-5.143	-4.25625
		rep2	-1.19153	-1.02431	-1.43827	-5.18954
		rep3	-1.80487	-0.524361	-4.14262	-1.65137
	BjuSUS12	rep1	2.04046	0.733358	-2.41933	-3.75497
		rep2	1.13418	0.988873	0.47805	-1.27322
		rep3	1.81189	2.29143	-0.418949	-0.462034
	BjuSUS13	rep1	1.01226	0.318321	-4.22668	-3.75497
		rep2	-0.690245	-0.277913	-0.685449	-1.18576
		rep3	0.517444	1.6802	-1.76687	-1.61958
	BjuSUS14	rep1	1.80873	0.710638	-3.64172	-3.018
		rep2	0.631683	0.503446	-0.936988	-0.68826
		rep3	1.16456	2.23841	-2.2263	-0.462034
Figure 7B									Figure 7B
	Genes	stages(stem dilation at diffierent stges)	stage1(2cm)	stage2(4cm)	stage3(6cm)	stage4(8cm)				Genes	stages(stem dilation at diffierent stges)	stage1(2cm)	stage2(4cm)	stage3(6cm)	stage4(8cm)
			Cq	Cq	Cq	Cq						2^(-△△Ct)	2^(-△△Ct)	2^(-△△Ct)	2^(-△△Ct)
qRT-PCR	BjuSUS01	rep1	29.4957	30.1807	31.7953	32.0721			Relative expression level	BjuSUS01	rep1	1.10931	0.689976	0.225316	0.185978
		rep2	29.8346	29.9772	31.9039	32.1489					rep2	0.877031	0.794501	0.208974	0.176341
		rep3	29.6057	30.1548	31.84	32.0964					rep3	1.02786	0.702506	0.218447	0.182872
		Cq Std. Dev	0.141189	0.0904358	0.0445794	0.0320325					SD	0.117852	0.0570755	0.00820557	0.00491861
	BjuSUS02	rep1	28.4348	28.6723	30.6441	31.6606				BjuSUS02	rep1	1.04668	0.887835	0.226334	0.111882
		rep2	28.3711	29.3683	30.5911	31.8927					rep2	1.09395	0.548021	0.234801	0.0952554
		rep3	28.696	28.8688	30.6237	31.6292					rep3	0.873349	0.774781	0.229564	0.114342
		Cq Std. Dev	0.140575	0.293005	0.0218176	0.117513					SD	0.116149	0.173048	0.00427282	0.0103828
	BjuSUS03	rep1	27.9696	27.784	29.2258	29.9727				BjuSUS03	rep1	1.11974	1.27352	0.468791	0.279341
		rep2	28.3545	27.7323	29.5653	30.2116					rep2	0.857565	1.31993	0.370489	0.236702
		rep3	28.0743	27.7524	28.9947	29.8419					rep3	1.04139	1.30164	0.550203	0.305852
		Cq Std. Dev	0.162471	0.0212516	0.23432	0.153091					SD	0.134579	0.0233778	0.0899894	0.0348868
	BjuSUS04	rep1	28.028	27.8015	29.5462	29.1989				BjuSUS04	rep1	0.987099	1.15489	0.34461	0.438426
		rep2	27.9146	27.6321	29.3855	29.2551					rep2	1.06781	1.29879	0.385225	0.421681
		rep3	28.0852	27.7568	29.4178	29.1767					rep3	0.948735	1.19128	0.376699	0.445207
		Cq Std. Dev	0.0708873	0.0716787	0.0694239	0.0329681					SD	0.06078	0.0748198	0.0214163	0.01211
	BjuSUS05	rep1	38.7505	37.8517	N/A	N/A				BjuSUS05	rep1	1.10445	2.06098	N/A	N/A
		rep2	39.0128	37.9213	N/A	N/A					rep2	0.922316	1.96337	N/A	N/A
		rep3	38.9204	38.0302	N/A	N/A					rep3	0.981686	1.81924	N/A	N/A
		Cq Std. Dev	0.133046	0.0899629	N/A	N/A					SD	0.0928897	0.121617	N/A	N/A
	BjuSUS06	rep1	37.8734	36.6995	N/A	N/A				BjuSUS06	rep1	1.0079	2.27397	N/A	N/A
		rep2	37.638	36.6637	N/A	N/A					rep2	1.18649	2.33109	N/A	N/A
		rep3	38.1428	36.4395	N/A	N/A					rep3	0.83622	2.72309	N/A	N/A
		Cq Std. Dev	0.252562	0.14094	N/A	N/A					SD	0.175145	0.244488	N/A	N/A
	BjuSUS07	rep1	39.3833	37.7	36.216	36.0181				BjuSUS07	rep1	0.92009	2.95507	8.26601	9.48098
		rep2	39.1411	37.6938	36.2374	36.243					rep2	1.0883	2.96771	8.14435	8.11253
		rep3	39.2651	38.1793	36.6243	35.9082					rep3	0.998672	2.1198	6.22847	10.2319
		Cq Std. Dev	0.121123	0.278499	0.229814	0.170679					SD	0.0841634	0.485935	1.14288	1.07457
	BjuSUS08	rep1	37.7151	34.0271	33.1658	33.5129				BjuSUS08	rep1	1.00663	9.83268	23.5699	18.5291
		rep2	37.5307	34.2409	33.1548	33.6296					rep2	1.14392	11.1872	23.7503	17.0892
		rep3	37.9282	34.5112	33.3228	33.7907					rep3	0.868429	9.27591	21.1385	15.2844
		Cq Std. Dev	0.198925	0.242597	0.0940221	0.139454					SD	0.137746	0.983021	1.45863	1.62576
	BjuSUS09	rep1	34.6729	35.3118	36.2939	35.8557				BjuSUS09	rep1	0.979101	0.628763	0.318311	0.431282
		rep2	34.3742	35.6644	36.3876	36.3983					rep2	1.20426	0.49244	0.2983	0.296081
		rep3	34.8801	34.1409	36.2199	35.7454					rep3	0.848112	1.41571	0.335059	0.465531
		Cq Std. Dev	0.254282	0.797545	0.0840182	0.349493					SD	0.180136	0.49838	0.0184037	0.0895968
	BjuSUS11	rep1	35.1801	34.2936	36.3082	37.5886				BjuSUS11	rep1	1.0927	2.01997	0.499925	0.205807
		rep2	35.6158	34.0385	35.9687	37.3299					rep2	0.807859	2.41068	0.632565	0.24623
		rep3	35.128	34.0444	36.7383	37.7615					rep3	1.13283	2.40092	0.371043	0.182565
		Cq Std. Dev	0.267851	0.145627	0.385701	0.217217					SD	0.177177	0.222814	0.130765	0.0322167
	BjuSUS12	rep1	34.8508	34.7886	35.1885	36.6599				BjuSUS12	rep1	0.849827	0.887273	0.672447	0.242505
		rep2	34.7478	35.0727	35.1397	36.741					rep2	0.912722	0.728687	0.695585	0.229253
		rep3	34.2495	35.3037	35.8857	36.7326					rep3	1.28923	0.620844	0.414763	0.230587
		Cq Std. Dev	0.321561	0.258028	0.417293	0.0445897					SD	0.237625	0.134017	0.155883	0.0072967
	BjuSUS13	rep1	34.3699	34.3447	37.6792	37.7095				BjuSUS13	rep1	1.26113	1.28332	0.127225	0.124574
		rep2	35.1603	34.2159	37.3959	38.1623					rep2	0.72915	1.40325	0.154824	0.0910199
		rep3	34.5836	33.7547	37.7074	38.2152					rep3	1.08749	1.93175	0.124757	0.0877398
		Cq Std. Dev	0.33384	0.253289	0.140659	0.226941					SD	0.27128	0.345004	0.0166924	0.0203855
	BjuSUS14	rep1	36.0102	35.2057	37.3592	37.1267				BjuSUS14	rep1	0.864925	1.51055	0.339528	0.398909
		rep2	35.6072	35.7414	37.0776	36.7795					rep2	1.14359	1.04204	0.41271	0.507452
		rep3	35.785	35.6428	36.6899	36.661					rep3	1.011	1.11574	0.539949	0.550891
		Cq Std. Dev	0.164869	0.232779	0.27438	0.197619					SD	0.139385	0.251926	0.101418	0.0782806
	UBC	rep1	25.1119	25.0555	26.1905	25.5709
		rep2	25.3107	25.2522	26.083	25.6611
		rep3	25.1949	24.7157	26.3471	25.7264
		Cq Mean	25.2058	25.0078	26.2069	25.6528
		Mean	25.5183
Figure 8									Figure 8
	Genes	phytohormones	CK	ABA	IAA	GA	SA			Genes	phytohormones	CK	ABA	IAA	GA	SA
			Cq	Cq	Cq	Cq	Cq					2^(-△△Ct)	2^(-△△Ct)	2^(-△△Ct)	2^(-△△Ct)	2^(-△△Ct)
qRT-PCR	BjuSUS01	rep1	33.4399	31.7911	32.3883	31.5519	32.6519		Relative expression level	BjuSUS01	rep1	1.07052	1.27711	0.777275	0.595828	0.683029
		rep2	33.6371	32.1737	32.6886	31.4185	33.3327				rep2	0.933769	0.979608	0.63123	0.653542	0.426096
		rep3	33.5377	32.0889	32.597	31.5541	32.9696				rep3	1.00038	1.03888	0.672601	0.594904	0.54802
		Cq Std. Dev	0.0804961	0.164074	0.125648	0.0634118	0.278127				SD	0.0683823	0.157465	0.0752741	0.0335909	0.128522
	BjuSUS02	rep1	33.0971	31.4342	31.1189	30.2221	31.6955			BjuSUS02	rep1	0.878765	1.05862	1.21277	0.969426	0.857882
		rep2	32.758	31.218	31.0366	30.061	31.6935				rep2	1.11161	1.22974	1.28395	1.08392	0.859059
		rep3	32.8768	31.1418	31.0171	30.0698	31.3473				rep3	1.0237	1.29645	1.30146	1.07731	1.09202
		Cq Std. Dev	0.140486	0.123835	0.0441221	0.0739306	0.163654				SD	0.117582	0.122672	0.0469738	0.0642804	0.134841
	BjuSUS03	rep1	31.4379	29.2963	30.4597	30.0241	29.5505			BjuSUS03	rep1	1.11084	1.86472	0.766535	0.445067	1.51861
		rep2	31.7047	29.2654	30.39	30.0049	30.077				rep2	0.92328	1.90509	0.804466	0.451015	1.05423
		rep3	31.626	29.2763	30.492	30.4253	29.8441				rep3	0.975025	1.89081	0.749541	0.337011	1.23893
		Cq Std. Dev	0.111939	0.0127975	0.0425701	0.193813	0.215442				SD	0.0968687	0.0204675	0.0281194	0.0641723	0.233801
	BjuSUS04	rep1	32.8	31.3555	31.1214	30.1106	31.5444			BjuSUS04	rep1	1.20896	1.25179	1.35559	1.17265	1.06661
		rep2	33.1268	31.3516	31.3194	30.2597	31.7442				rep2	0.963901	1.25514	1.18177	1.05756	0.928704
		rep3	33.2945	31.1503	31.5764	30.1356	31.4029				rep3	0.858133	1.44306	0.988922	1.15252	1.17653
		Cq Std. Dev	0.205332	0.0958062	0.186271	0.0651713	0.139989				SD	0.179964	0.109474	0.183417	0.0614673	0.124177
	BjuSUS06	rep1	38.1648	38.1829	38.5716	N/A	38.4546			BjuSUS06	rep1	1.16287	0.436901	0.307248	N/A	0.351512
		rep2	38.601	37.1749	38.8136	N/A	37.7105				rep2	0.859456	0.878659	0.259795	N/A	0.588745
		rep3	38.3817	38.3819	38.7452	N/A	38.8023				rep3	1.00056	0.380613	0.272409	N/A	0.276223
		Cq Std. Dev	0.178077	0.528357	0.101873	N/A	0.455412				SD	0.151831	0.272754	0.0245785	N/A	0.163104
	BjuSUS07	rep1	38.8431	36.7245	37.3904	39.3313	37.5566			BjuSUS07	rep1	1.10421	1.82421	1.0587	0.288533	0.995271
		rep2	39.1106	36.3471	37.389	39.2859	36.9748				rep2	0.917301	2.36975	1.05968	0.297752	1.48967
		rep3	39.0046	36.361	37.0956	38.9534	37.1526				rep3	0.987268	2.34698	1.29866	0.374929	1.31694
		Cq Std. Dev	0.110007	0.174745	0.138621	0.168461	0.243443				SD	0.0944349	0.3086	0.138256	0.0474437	0.250911
	BjuSUS08	rep1	37.3078	38.0386	N/A	N/A	37.927			BjuSUS08	rep1	0.966472	0.582384	N/A	N/A	0.629209
		rep2	37.1628	37.9354	N/A	N/A	38.0158				rep2	1.06867	0.625564	N/A	N/A	0.591645
		rep3	37.3052	37.739	N/A	N/A	37.432				rep3	0.968204	0.716753	N/A	N/A	0.886759
		Cq Std. Dev	0.0677619	0.124228	N/A	N/A	0.25685				SD	0.0585114	0.0685994	N/A	N/A	0.160642
	BjuSUS09	rep1	35.5915	36.382	37.2845	36.4674	37.2443			BjuSUS09	rep1	1.05611	0.610596	0.326647	0.575469	0.335867
		rep2	35.8154	36.3058	36.5194	37.3463	37.3031				rep2	0.904269	0.643706	0.5551	0.312943	0.322458
		rep3	35.6038	37.0591	36.7995	36.848	37.2462				rep3	1.04711	0.381883	0.457144	0.442031	0.335432
		Cq Std. Dev	0.102779	0.33857	0.316025	0.359855	0.0272803				SD	0.085187	0.14257	0.114612	0.131269	0.00761969
	BjuSUS11	rep1	36.3368	35.9318	36.0201	35.1402	35.543			BjuSUS11	rep1	1.23367	1.63357	1.53656	1.16012	2.13873
		rep2	36.8448	36.3516	35.6607	35.0822	35.6233				rep2	0.867516	1.22107	1.97122	1.2077	2.02295
		rep3	36.7377	36.6042	36.0168	35.142	35.3793				rep3	0.934376	1.02496	1.54008	1.15864	2.3958
		Cq Std. Dev	0.218643	0.277346	0.168644	0.0277762	0.101554				SD	0.194988	0.310647	0.249944	0.0279035	0.190832
	BjuSUS12	rep1	38.3061	39.4526	39.3716	38.3236	38.1634			BjuSUS12	rep1	0.794162	0.358724	0.379448	0.784555	0.87675
		rep2	37.8454	38.5297	39.1538	38.7524	38.0902				rep2	1.0929	0.680159	0.441283	0.58286	0.922375
		rep3	37.7693	38.15	39.9225	38.7969	36.9847				rep3	1.15216	0.884901	0.259004	0.565126	0.992306
		Cq Std. Dev	0.237157	0.547005	0.323507	0.213387	0.539184				SD	0.191883	0.265236	0.0926969	0.121891	0.0582025
	BjuSUS13	rep1	37.1654	34.5811	34.4034	33.5921	35.007			BjuSUS13	rep1	1.15906	2.54778	2.88184	2.07465	1.89656
		rep2	37.2418	34.7676	34.3022	33.7722	35.0131				rep2	1.09928	2.23882	3.09118	1.83127	1.88859
		rep3	37.7279	34.5657	34.4246	33.9391	35.2906				rep3	0.784848	2.57522	2.83967	1.63119	1.55806
		Cq Std. Dev	0.249104	0.0917769	0.0534132	0.141675	0.132301				SD	0.201029	0.186802	0.134695	0.222085	0.193178
	BjuSUS14	rep1	38.1715	36.5507	36.6452	37.1336	36.2729			BjuSUS14	rep1	1.30636	1.47268	1.37928	0.983125	1.78537
		rep2	38.6264	36.6169	36.7636	36.8936	36.9245				rep2	0.953128	1.40658	1.27056	1.16106	1.1365
		rep3	38.8734	36.2507	36.697	36.5736	37.1034				rep3	0.803128	1.81296	1.33062	1.44939	1.00392
		Cq Std. Dev	0.290686	0.159305	0.0484855	0.229395	0.356913				SD	0.258367	0.218062	0.0544621	0.235301	0.418182
	UBC	rep1	31.8684	30.3789	30.338	29.135	30.415
		rep2	31.8214	30.4879	30.3203	29.1235	30.4046
		rep3	31.8839	30.5242	30.6753	29.1152	30.4452
		Cq Mean	31.8579	30.4636	30.4445	29.1246	30.4216
		Mean	30.4625
Figure 9									Figure 9
	Genes	abiotic stresses	CK	Salt	Drought	Heat	Cold			Genes	abiotic stresses	CK	Salt	Drought	Heat	Cold
			Cq	Cq	Cq	Cq	Cq					2^(-△△Ct)	2^(-△△Ct)	2^(-△△Ct)	2^(-△△Ct)	2^(-△△Ct)
qRT-PCR	BjuSUS01	rep1	33.4399	38.9226	39.7436	37.6334	35.8965		Relative expression level	BjuSUS01	rep1	1.07052	0.0239402	0.0135514	0.0585096	0.195026
		rep2	33.6371	39.0705	39.1653	37.1518	36.1796				rep2	0.933769	0.0216157	0.0202337	0.0816968	0.160276
		rep3	33.5377	39.1302	37.2624	38.0686	35.6673				rep3	1.00038	0.0207352	0.075667	0.043273	0.228609
		Cq Std. Dev	0.0804961	0.087242	1.05998	0.374446	0.209541				SD	0.0683823	0.00165584	0.0340976	0.0193485	0.0341682
	BjuSUS02	rep1	33.0971	38.1129	35.8827	35.6289	35.1662			BjuSUS02	rep1	0.878765	0.0271623	0.127438	0.151957	0.20942
		rep2	32.758	37.0769	36.2265	36.2416	34.4893				rep2	1.11161	0.0556963	0.100417	0.0993771	0.33478
		rep3	32.8768	37.2942	35.5386	36.2712	34.2425				rep3	1.0237	0.0479087	0.161767	0.0973547	0.39726
		Cq Std. Dev	0.140486	0.446057	0.280842	0.296059	0.390473				SD	0.117582	0.0147493	0.0307477	0.0309574	0.0956582
	BjuSUS03	rep1	31.4379	30.0431	30.0393	29.9203	30.3125			BjuSUS03	rep1	1.11084	2.92095	2.92859	3.1805	2.42345
		rep2	31.7047	30.0065	30.0919	29.9227	30.386				rep2	0.92328	2.99605	2.82383	3.17515	2.30307
		rep3	31.626	30.1963	29.9827	29.9968	30.1876				rep3	0.975025	2.62675	3.0458	3.0163	2.64259
		Cq Std. Dev	0.111939	0.0822041	0.0445783	0.035491	0.0818945				SD	0.0968687	0.195184	0.111044	0.0932939	0.172136
	BjuSUS04	rep1	32.8	37.0795	35.7894	37.0581	33.853			BjuSUS04	rep1	1.20896	0.0622505	0.152238	0.0631824	0.582659
		rep2	33.1268	36.9086	36.086	39.0358	34.1374				rep2	0.963901	0.0700789	0.123944	0.0160416	0.478406
		rep3	33.2945	36.3472	35.5307	39.1172	34.2095				rep3	0.858133	0.103419	0.182129	0.0151618	0.455114
		Cq Std. Dev	0.205332	0.312831	0.226867	0.95206	0.153882				SD	0.179964	0.0218622	0.0290962	0.0274743	0.0679204
	BjuSUS07	rep1	38.8431	39.5221	N/A	39.4699	39.5113			BjuSUS07	rep1	1.10421	0.689657	N/A	0.715074	0.694873
		rep2	39.1106	39.7157	N/A	39.3505	38.6736				rep2	0.917301	0.603048	N/A	0.776782	1.2418
		rep3	39.0046	39.0458	N/A	39.4331	39.9402				rep3	0.987268	0.959475	N/A	0.73356	0.516154
		Cq Std. Dev	0.110007	0.281518	N/A	0.0499314	0.525966				SD	0.0944349	0.185896	N/A	0.0316696	0.378072
	BjuSUS08	rep1	37.3078	38.7112	39.0334	38.9445	35.6136			BjuSUS08	rep1	0.966472	0.36535	0.292226	0.310815	3.12738
		rep2	37.1628	38.1348	38.3599	38.5939	35.6212				rep2	1.06867	0.544807	0.466081	0.396321	3.111
		rep3	37.3052	37.7364	39.2294	37.7534	35.3957				rep3	0.968204	0.71807	0.255114	0.70968	3.63739
		Cq Std. Dev	0.0677619	0.400186	0.372367	0.49979	0.104572				SD	0.0585114	0.176369	0.112628	0.209999	0.299291
	BjuSUS09	rep1	35.5915	36.6474	38.533	37.846	37.1324			BjuSUS09	rep1	1.05611	0.507985	0.137473	0.221328	0.362962
		rep2	35.8154	37.0341	38.4956	38.5019	37.7181				rep2	0.904269	0.388552	0.141092	0.140471	0.241844
		rep3	35.6038	36.9476	37.1384	37.6232	36.7116				rep3	1.04711	0.412544	0.361448	0.258286	0.48587
		Cq Std. Dev	0.102779	0.165709	0.648783	0.372971	0.412736				SD	0.085187	0.0631782	0.12828	0.0602553	0.122014
	UBC	rep1	31.8684	32.1456	30.8304	32.1035	31.5163
		rep2	31.8214	32.1209	30.7213	32.2064	31.4461
		rep3	31.8839	32.1883	30.7989	32.1999	31.2896
		Cq Mean	31.8579	32.1516	30.7836	32.1699	31.4173
		Mean	31.6761
